# Supplementary material for: Somatostatin 1.1 contributes to the innate exploration of zebrafish larva
Source: PubMed Central journal article supplement (PMC7499426; doi:10.1038/s41598-020-72039-x), 2020-09-17
Supplement: 41598_2020_72039_MOESM1_ESM.pdf [file 41598_2020_72039_MOESM1_ESM.pdf]

# Escape analysis

FX Lejeune - iCONICS

2020-04-18

## Table of Contents

|                                                |    |
|------------------------------------------------|----|
| Import data from files .....                   | 4  |
| Method .....                                   | 5  |
| Analysis using one average value per fish..... | 6  |
| Data visualization.....                        | 6  |
| Correlation matrix .....                       | 7  |
| Cbend [log, ns] .....                          | 8  |
| Fitting LMM.....                               | 8  |
| Checking model assumptions.....                | 9  |
| Conclusion .....                               | 9  |
| Counterbend [sqrt, ns] .....                   | 10 |
| Fitting LMM.....                               | 10 |
| Checking model assumptions.....                | 11 |
| Conclusion .....                               | 11 |
| Distance [log, ns] .....                       | 12 |
| Fitting LMM.....                               | 12 |
| Checking model assumptions.....                | 13 |
| Conclusion .....                               | 13 |
| Duration [ns] .....                            | 14 |
| Fitting LMM.....                               | 14 |
| Checking model assumptions.....                | 15 |
| Conclusion .....                               | 15 |
| Latency [sqrt, ns] .....                       | 16 |
| Fitting LMM.....                               | 16 |
| Checking model assumptions.....                | 17 |
| Conclusion .....                               | 17 |
| mTBF [ns] .....                                | 18 |
| Fitting LMM.....                               | 18 |

|                                           |    |
|-------------------------------------------|----|
| Checking model assumptions.....           | 19 |
| Conclusion .....                          | 19 |
| Number of oscillations [sqrt, ns] .....   | 20 |
| Fitting LMM.....                          | 20 |
| Checking model assumptions.....           | 21 |
| Conclusion .....                          | 21 |
| Speed [ns] .....                          | 22 |
| Fitting LMM.....                          | 22 |
| Checking model assumptions.....           | 23 |
| Conclusion .....                          | 23 |
| Analysis across the 10 trials .....       | 24 |
| Data visualization.....                   | 24 |
| Data visualization with clutch info ..... | 25 |
| Correlation matrix .....                  | 26 |
| Cbend [ns].....                           | 27 |
| Fitting LMM.....                          | 27 |
| Group comparison at each trial.....       | 28 |
| Checking model assumptions.....           | 30 |
| Conclusion .....                          | 30 |
| Counterbend [ns].....                     | 31 |
| Fitting LMM.....                          | 31 |
| Group comparison at each trial.....       | 32 |
| Checking model assumptions.....           | 34 |
| Conclusion .....                          | 34 |
| Distance [ns].....                        | 35 |
| Fitting LMM.....                          | 35 |
| Group comparison at each trial.....       | 36 |
| Checking model assumptions.....           | 38 |
| Conclusion .....                          | 38 |
| Duration [sqrt, ns].....                  | 39 |
| Fitting LMM.....                          | 39 |
| Group comparison at each trial.....       | 40 |
| Checking model assumptions.....           | 42 |
| Conclusion .....                          | 42 |

|                                     |    |
|-------------------------------------|----|
| Latency [ns] .....                  | 43 |
| Fitting LMM.....                    | 43 |
| Group comparison at each trial..... | 44 |
| Checking model assumptions.....     | 46 |
| Conclusion .....                    | 46 |
| mTBF [ns] .....                     | 47 |
| Fitting LMM.....                    | 47 |
| Group comparison at each trial..... | 48 |
| Checking model assumptions.....     | 50 |
| Conclusion .....                    | 50 |
| Number of oscillations [ns].....    | 51 |
| Fitting LMM.....                    | 51 |
| Group comparison at each trial..... | 52 |
| Checking model assumptions.....     | 54 |
| Conclusion .....                    | 54 |
| Speed [ns] .....                    | 55 |
| Fitting LMM.....                    | 55 |
| Group comparison at each trial..... | 56 |
| Checking model validity .....       | 58 |
| Conclusion .....                    | 58 |
| R session information.....          | 59 |

Statistical analysis for Feng Quan and Claire Wyart

## Import data from files

8 kinematic parameters were measured at 10 trials in the slow and fast swim gait: Cbend, Counterbend, Distance, Duration, Latency, mTBF, NumOfOsc and Speed.

### *Number of values used by Genotype and Clutch*

|       | Cbend | Counterbend | Distance | Duration | Latency | mTBF | NumOfOsc | Speed |
|-------|-------|-------------|----------|----------|---------|------|----------|-------|
| WT_2  | 18    | 18          | 18       | 18       | 18      | 18   | 18       | 18    |
| WT_3  | 20    | 20          | 20       | 20       | 20      | 20   | 20       | 20    |
| WT_4  | 28    | 28          | 28       | 28       | 28      | 28   | 28       | 28    |
| WT_5  | 25    | 25          | 25       | 25       | 25      | 25   | 25       | 25    |
| Hom_2 | 17    | 17          | 17       | 17       | 17      | 17   | 17       | 17    |
| Hom_3 | 23    | 23          | 23       | 23       | 23      | 23   | 23       | 23    |
| Hom_4 | 14    | 14          | 14       | 14       | 14      | 14   | 14       | 14    |
| Hom_5 | 26    | 26          | 26       | 26       | 26      | 26   | 26       | 26    |

### *Mean values by Genotype and Clutch*

|             | WT_2  | WT_3  | WT_4  | WT_5 | Hom_2 | Hom_3 | Hom_4 | Hom_5 |
|-------------|-------|-------|-------|------|-------|-------|-------|-------|
| Cbend       | 103.4 | 102.5 | 101.3 | 92.3 | 104.9 | 101.6 | 102.7 | 91.5  |
| Counterbend | 45.6  | 46.6  | 46.2  | 36.5 | 42.9  | 49.2  | 51.8  | 40.9  |
| Distance    | 8.6   | 9.6   | 9.1   | 8.3  | 9.1   | 10.3  | 9.2   | 8.0   |
| Duration    | 0.3   | 0.3   | 0.2   | 0.3  | 0.3   | 0.3   | 0.3   | 0.3   |
| Latency     | 6.2   | 5.0   | 5.2   | 3.6  | 6.6   | 5.2   | 5.8   | 4.0   |
| mTBF        | 34.8  | 36.9  | 37.2  | 43.6 | 31.9  | 37.9  | 37.2  | 44.7  |
| NumOfOsc    | 8.0   | 9.7   | 7.5   | 8.8  | 7.7   | 8.5   | 7.9   | 8.8   |
| Speed       | 33.5  | 34.5  | 38.1  | 34.9 | 33.4  | 39.3  | 37.4  | 34.0  |

## Method

All statistical analyses were conducted using R version 3.6.1 (<https://www.R-project.org/>), and plots were generated with the ggplot2 package.

Between-group comparison based on trial-averaged values was conducted through a linear mixed model using the lmer function in the lme4 package (for multiple-day data collection). Mean difference between the two groups (Hom and WT) was then tested using the emmeans package with the Tukey's method for multiplicity adjustment. To better match the model assumptions (normality and homoscedasticity of residuals), data were transformed by the natural logarithm or the square root function prior to modeling.

Between-group comparison across the ten trials was performed using a linear mixed model (function lmer in the lme4 package) with the fixed effects of Genotype and Trial, and the random effect of Fish\_ID nested within Clutch for repeated measures. Significance for the main effects of genotype (WT vs. Homozygous mutants), Trial and their interaction was then evaluated using the Anova function in the car package with Type II Wald chi-square tests. To improve normality and homoscedasticity of residuals, data were transformed by the natural logarithm or the square root function prior to modeling.

For each kinematic parameter, the estimated marginal means and model-based standard errors on the original scale (non-transformed data) were extracted for each genotype using the emmeans package.

The level of statistical significance was set at  $p < 0.05$  for all tests.

# Analysis using one average value per fish

## Data visualization

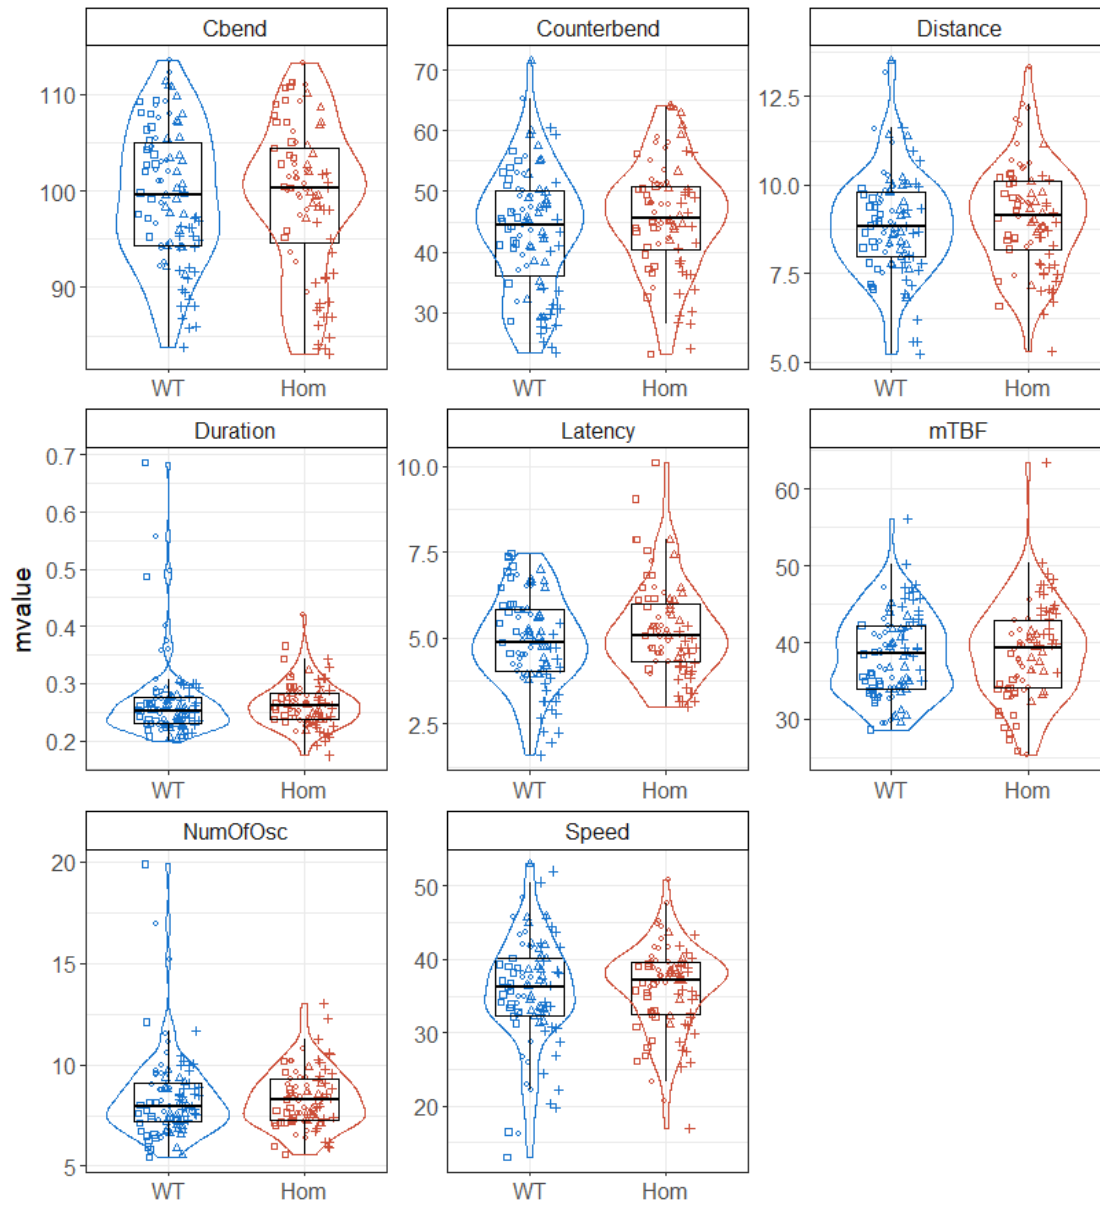

Clutch □ day2 ○ day3 △ day4 + day5 FishGeno ● WT ● Hom

## Correlation matrix

Using Spearman's rank correlations on average values:

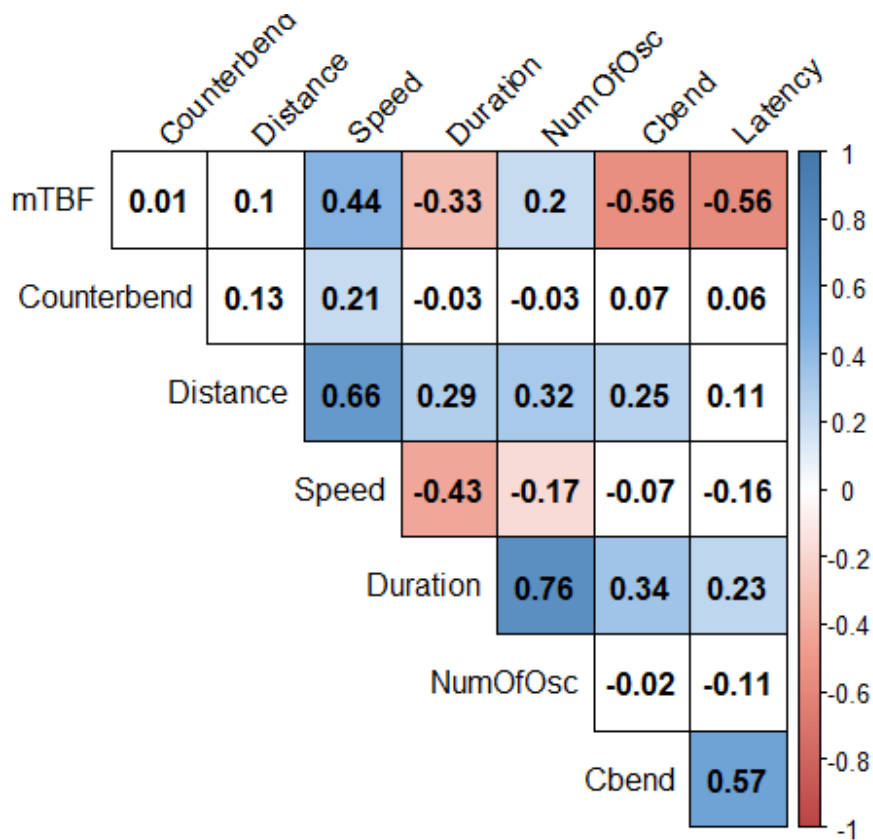

Based on 8 kinematic parameters, variance of eigenvalues of the correlation matrix is 0.879 leading to an effective number of independent tests ( $M_{eff}$ ) of 7.230 to be used for multiple testing correction. Method described in Nyholt DR, A simple correction for multiple testing for single-nucleotide polymorphisms in linkage disequilibrium with each other, Am J Hum Genet, 2004 [PMID: 14997420].

## Cbend [log, ns]

### Fitting LMM

```
## Linear mixed model fit by REML ['lmerMod']
## Formula: log(mvalue) ~ FishGeno + (1 | Clutch)
## Data: tmp
## REML criterion at convergence: -481.027
## Random effects:
## Groups Name Std.Dev.
## Clutch (Intercept) 0.05604
## Residual 0.05491
## Number of obs: 171, groups: Clutch, 4
## Fixed Effects:
## (Intercept) FishGenoHom
## 4.601577 0.001289

## Analysis of Deviance Table (Type II Wald chisquare tests)
##
## Response: log(mvalue)
## Chisq Df Pr(>Chisq)
## FishGeno 0.0229 1 0.8797
```

Estimated marginal means with model-based standard errors and 95% confidence limits on the original scale (non-transformed data):

```
## 'emmGrid' object with variables:
## FishGeno = WT, Hom
## Transformation: "log"

## FishGeno response SE df lower.CL upper.CL
## WT 99.6 2.85 3.12 91.1 109
## Hom 99.8 2.86 3.16 91.3 109
##
## Degrees-of-freedom method: kenward-roger
## Confidence level used: 0.95
## Intervals are back-transformed from the log scale
```



## Checking model assumptions

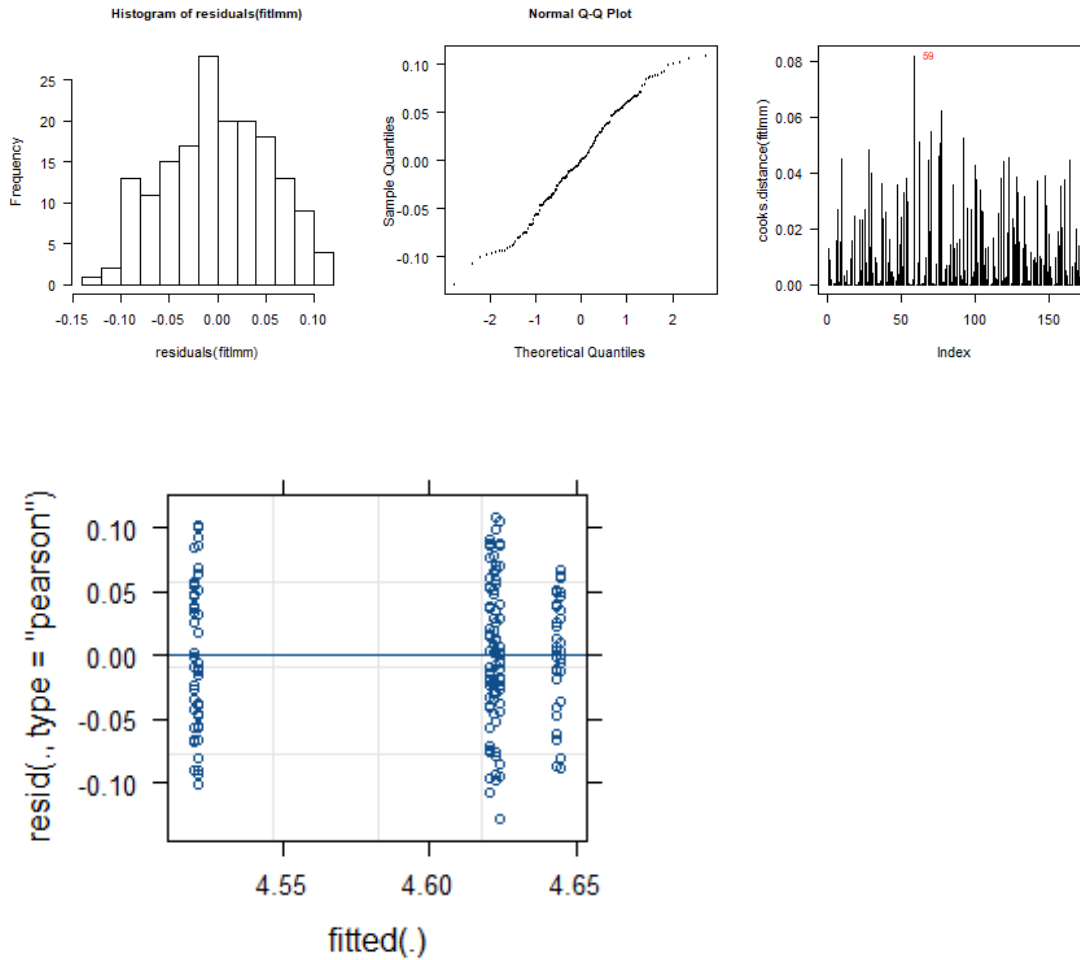

## Conclusion

No significant difference was detected between the two groups (Type II Wald chi-square test;  $n^s p = 0.880$ ). Adj. Pvalue:  $n^s p = 1$  (using Meff = 7.230 tests).

## Counterbend [sqrt, ns]

### Fitting LMM

```
## Linear mixed model fit by REML ['lmerMod']
## Formula: sqrt(mvalue) ~ FishGeno + (1 | Clutch)
## Data: tmp
## REML criterion at convergence: 360.0286
## Random effects:
## Groups Name Std.Dev.
## Clutch (Intercept) 0.3431
## Residual 0.6689
## Number of obs: 171, groups: Clutch, 4
## Fixed Effects:
## (Intercept) FishGenoHom
## 6.5521 0.2117

## Analysis of Deviance Table (Type II Wald chisquare tests)
##
## Response: sqrt(mvalue)
## Chisq Df Pr(>Chisq)
## FishGeno 4.1674 1 0.04121 *
## ---
## Signif. codes: 0 '***' 0.001 '**' 0.01 '*' 0.05 '.' 0.1 ' ' 1
```

Estimated marginal means with model-based standard errors and 95% confidence limits on the original scale (non-transformed data):

```
## 'emmGrid' object with variables:
## FishGeno = WT, Hom
## Transformation: "sqrt"

## FishGeno response SE df lower.CL upper.CL
## WT 42.9 2.43 3.45 36.0 50.4
## Hom 45.7 2.54 3.59 38.7 53.4
##
## Degrees-of-freedom method: kenward-roger
## Confidence level used: 0.95
## Intervals are back-transformed from the sqrt scale
```

## Checking model assumptions

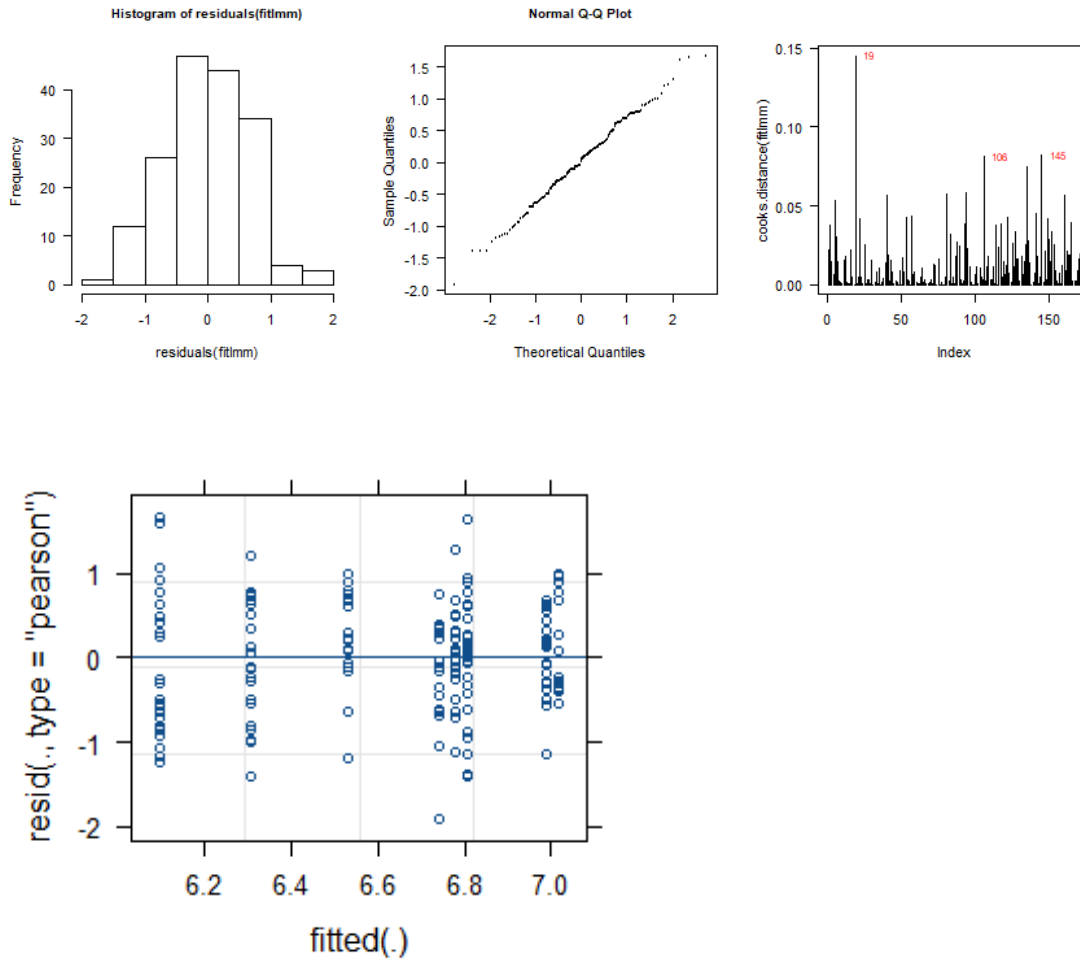

## Conclusion

Linear mixed model indicated a significant difference between the two groups (Type II Wald chi-square test; \* $p = 0.041$ ). Adj. Pvalue:  $^{ns}p = 0.298$  (using Meff = 7.230 tests). Unadjusted p-value remains significant after removing the most influential data point 19 (see Cook's distance).

## Distance [log, ns]

The residuals distribution is skewed without the log transformations.

### Fitting LMM

```
## Linear mixed model fit by REML ['lmerMod']
## Formula: log(mvalue) ~ FishGeno + (1 | Clutch)
## Data: tmp
## REML criterion at convergence: -146.0768
## Random effects:
## Groups Name Std.Dev.
## Clutch (Intercept) 0.0846
## Residual 0.1494
## Number of obs: 171, groups: Clutch, 4
## Fixed Effects:
## (Intercept) FishGenoHom
## 2.17487 0.02371

## Analysis of Deviance Table (Type II Wald chisquare tests)
##
## Response: log(mvalue)
## Chisq Df Pr(>Chisq)
## FishGeno 1.0477 1 0.306
```

Estimated marginal means with model-based standard errors and 95% confidence limits on the original scale (non-transformed data):

```
## 'emmGrid' object with variables:
## FishGeno = WT, Hom
## Transformation: "log"

## FishGeno response SE df lower.CL upper.CL
## WT 8.80 0.397 3.37 7.69 10.1
## Hom 9.01 0.411 3.49 7.88 10.3
##
## Degrees-of-freedom method: kenward-roger
## Confidence level used: 0.95
## Intervals are back-transformed from the log scale
```

## Checking model assumptions

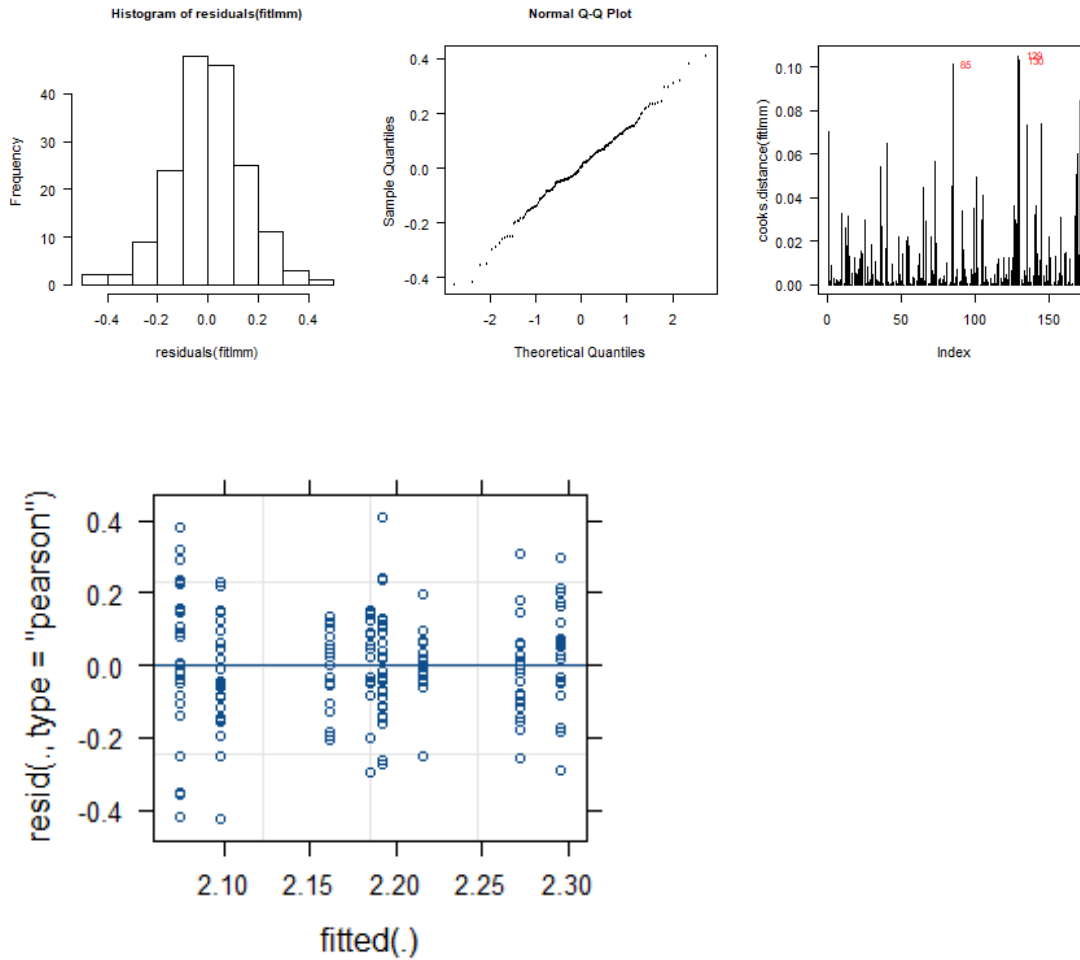

## Conclusion

No significant difference was detected between the two groups (Type II Wald chi-square test;  $^{ns}p = 0.306$ ). Adj. Pvalue:  $^{ns}p = 1$  (for Meff = 7.230 tests).

## Duration [ns]

### Fitting LMM

```
## Linear mixed model fit by REML ['lmerMod']
## Formula: mvalue ~ FishGeno + (1 | Clutch)
## Data: tmp
## REML criterion at convergence: -468.2959
## Random effects:
## Groups Name Std.Dev.
## Clutch (Intercept) 0.01968
## Residual 0.05805
## Number of obs: 171, groups: Clutch, 4
## Fixed Effects:
## (Intercept) FishGenoHom
## 0.271820 -0.008976

## Analysis of Deviance Table (Type II Wald chisquare tests)
##
## Response: mvalue
## Chisq Df Pr(>Chisq)
## FishGeno 0.9967 1 0.3181
```

Estimated marginal means with model-based standard errors and 95% confidence limits on the original scale (non-transformed data):

```
## 'emmGrid' object with variables:
## FishGeno = WT, Hom

## FishGeno emmean SE df lower.CL upper.CL
## WT 0.272 0.0116 3.95 0.239 0.304
## Hom 0.263 0.0118 4.27 0.231 0.295
##
## Degrees-of-freedom method: kenward-roger
## Confidence level used: 0.95
```

## Checking model assumptions

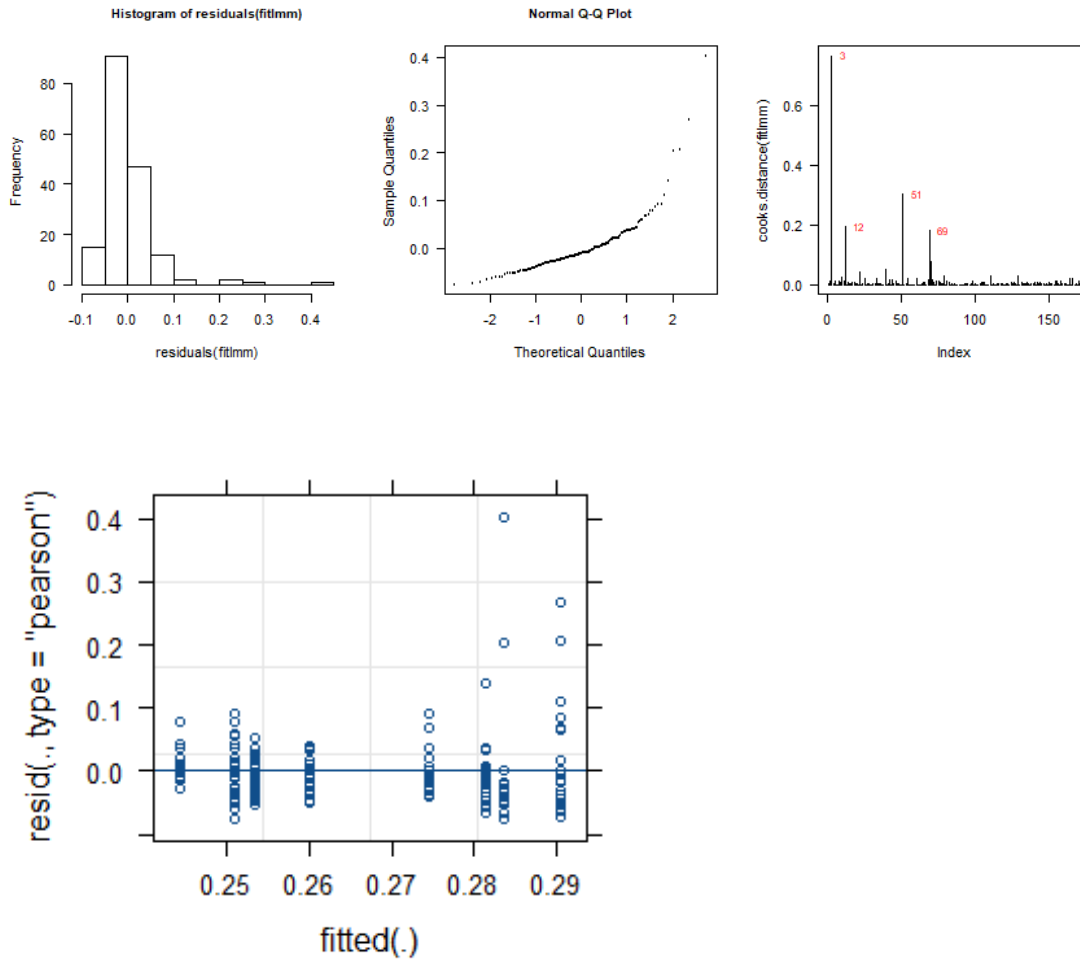

## Conclusion

Bad model fit. There does not seem to be any significant effect of the group (Type II Wald chi-square test;  $^{ns}p = 0.318$ ). Adj. Pvalue:  $^{ns}p = 1$  (for Meff = 7.230 tests).

## Latency [sqrt, ns]

Skewed distribution of residuals without square root transformation.

### Fitting LMM

```
## Linear mixed model fit by REML ['lmerMod']
## Formula: sqrt(mvalue) ~ FishGeno + (1 | Clutch)
## Data: tmp
## REML criterion at convergence: -15.6549
## Random effects:
## Groups Name Std.Dev.
## Clutch (Intercept) 0.2353
## Residual 0.2173
## Number of obs: 171, groups: Clutch, 4
## Fixed Effects:
## (Intercept) FishGenoHom
## 2.21005 0.09109

## Analysis of Deviance Table (Type II Wald chisquare tests)
##
## Response: sqrt(mvalue)
## Chisq Df Pr(>Chisq)
## FishGeno 7.297 1 0.006907 **
## ---
## Signif. codes: 0 '***' 0.001 '**' 0.01 '*' 0.05 '.' 0.1 ' ' 1
```

Estimated marginal means with model-based standard errors and 95% confidence limits on the original scale (non-transformed data):

```
## 'emmGrid' object with variables:
## FishGeno = WT, Hom
## Transformation: "sqrt"

## FishGeno response SE df lower.CL upper.CL
## WT 4.88 0.530 3.10 3.37 6.68
## Hom 5.30 0.553 3.14 3.72 7.15
##
## Degrees-of-freedom method: kenward-roger
## Confidence level used: 0.95
## Intervals are back-transformed from the sqrt scale
```



## Checking model assumptions

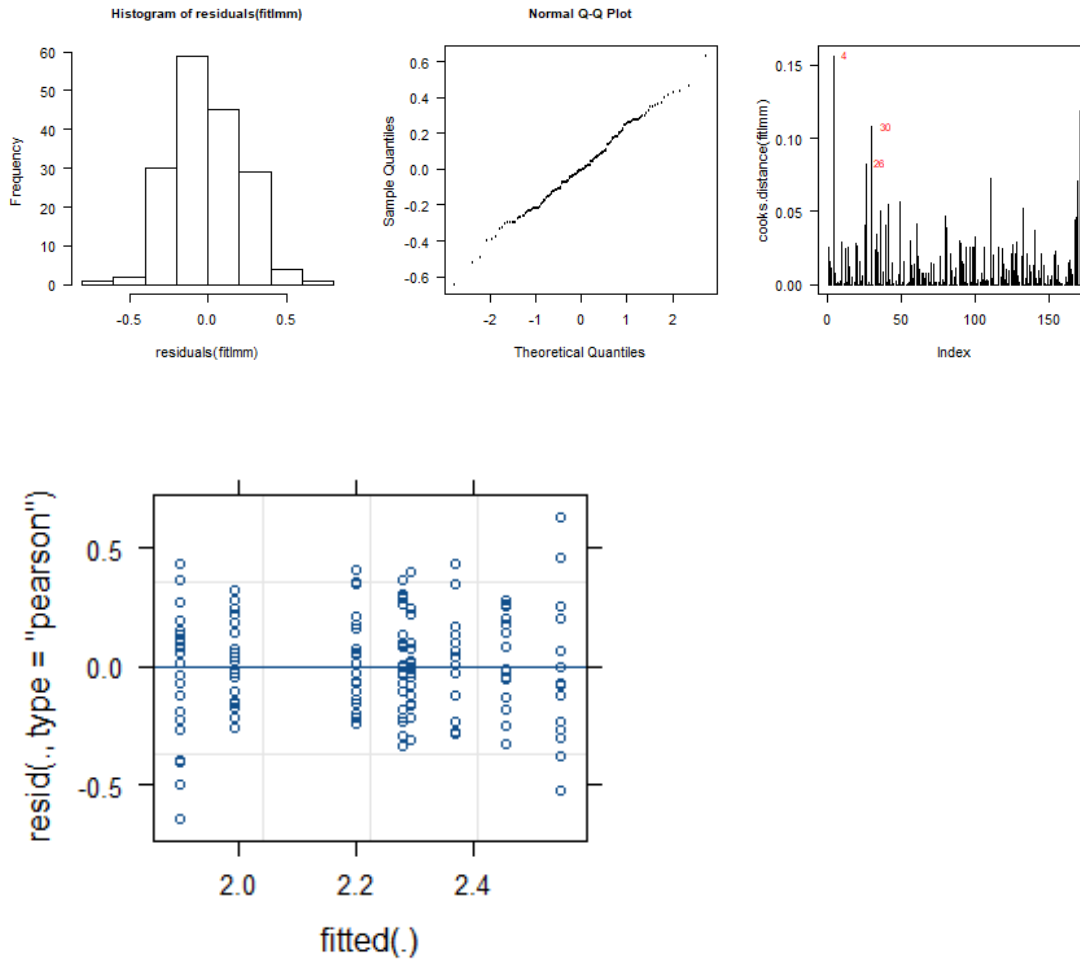

## Conclusion

Linear mixed model indicated a significant difference between the two groups (ANOVA Type II test;  $**p = 6.9e-3$ ). Adj. Pvalue:  $^{ns}p = 0.050$  (using  $M_{eff} = 7.230$  tests). However, checking for model assumptions, we did not retain the effect as it was no more present after exclusion of one influential observation (point 4) indicated by the Cook's distance.

## mTBF [ns]

### Fitting LMM

```
## Linear mixed model fit by REML ['lmerMod']
## Formula: mvalue ~ FishGeno + (1 | Clutch)
## Data: tmp
## REML criterion at convergence: 998.9557
## Random effects:
## Groups Name Std.Dev.
## Clutch (Intercept) 4.439
## Residual 4.378
## Number of obs: 171, groups: Clutch, 4
## Fixed Effects:
## (Intercept) FishGenoHom
## 38.07237 -0.02279

## Analysis of Deviance Table (Type II Wald chisquare tests)
##
## Response: mvalue
## Chisq Df Pr(>Chisq)
## FishGeno 0.0011 1 0.9732
```

Estimated marginal means with model-based standard errors and 95% confidence limits on the original scale (non-transformed data):

```
## 'emmGrid' object with variables:
## FishGeno = WT, Hom

## FishGeno emmean SE df lower.CL upper.CL
## WT 38.1 2.27 3.12 31 45.1
## Hom 38.0 2.27 3.16 31 45.1
##
## Degrees-of-freedom method: kenward-roger
## Confidence level used: 0.95
```

## Checking model assumptions

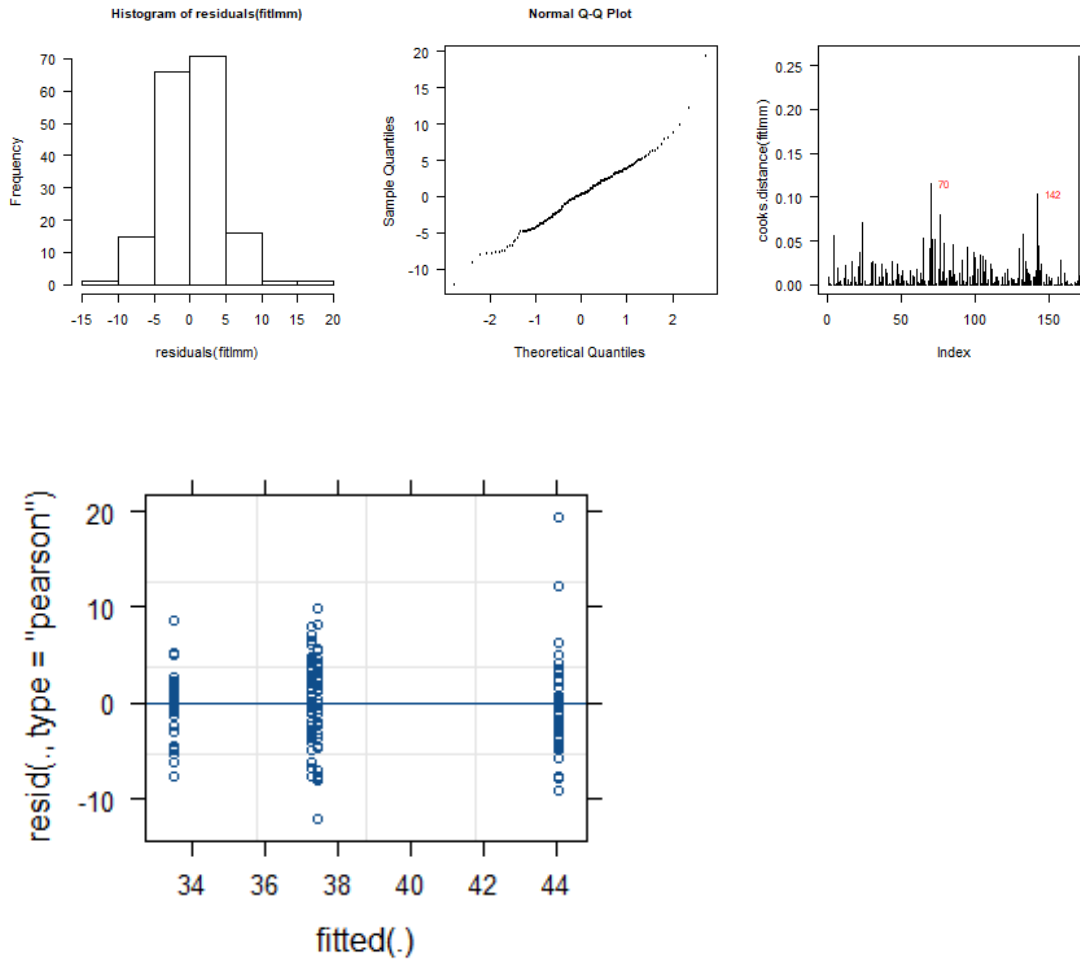

## Conclusion

No significant difference was detected between the two groups (Type II Wald chi-square test;  $n^s p = 0.973$ ). Adj. Pvalue:  $n^s p = 1$  (for Meff = 7.230 tests).

## Number of oscillations [sqrt, ns]

### Fitting LMM

```
## Linear mixed model fit by REML ['lmerMod']
## Formula: sqrt(mvalue) ~ FishGeno + (1 | Clutch)
## Data: tmp
## REML criterion at convergence: 71.1761
## Random effects:
## Groups Name Std.Dev.
## Clutch (Intercept) 0.1132
## Residual 0.2857
## Number of obs: 171, groups: Clutch, 4
## Fixed Effects:
## (Intercept) FishGenoHom
## 2.88692 -0.03236

## Analysis of Deviance Table (Type II Wald chisquare tests)
##
## Response: sqrt(mvalue)
## Chisq Df Pr(>Chisq)
## FishGeno 0.5342 1 0.4648
```

Estimated marginal means with model-based standard errors and 95% confidence limits on the original scale (non-transformed data):

```
## 'emmGrid' object with variables:
## FishGeno = WT, Hom
## Transformation: "sqrt"

## FishGeno response SE df lower.CL upper.CL
## WT 8.33 0.370 3.72 7.31 9.43
## Hom 8.15 0.372 3.96 7.14 9.22
##
## Degrees-of-freedom method: kenward-roger
## Confidence level used: 0.95
## Intervals are back-transformed from the sqrt scale
```

## Checking model assumptions

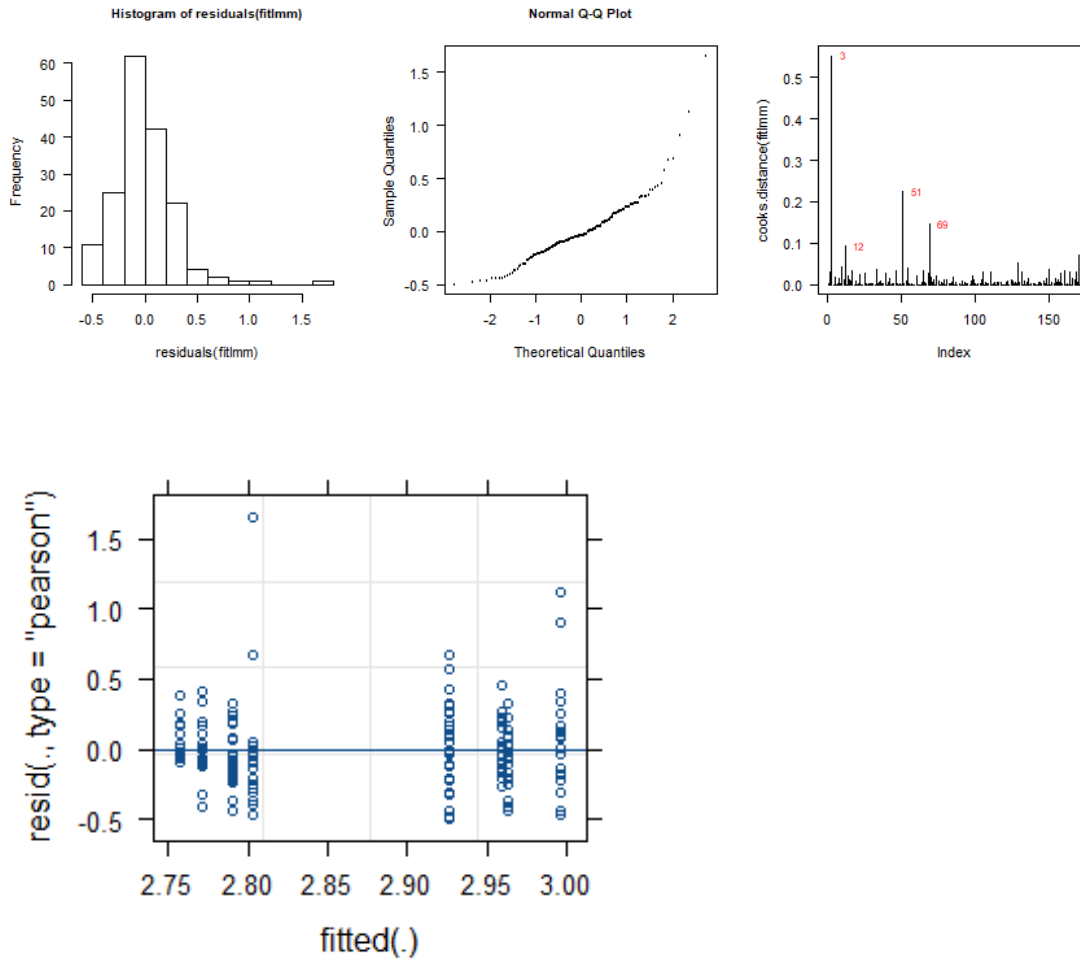

## Conclusion

No significant difference was detected between the two groups (Type II Wald chi-square test;  $n^s p = 0.465$ ). Adj. Pvalue:  $n^s p = 1$  (for Meff = 7.230 tests).

## Speed [ns]

### Fitting LMM

```
## Linear mixed model fit by REML ['lmerMod']
## Formula: mvalue ~ FishGeno + (1 | Clutch)
## Data: tmp
## REML criterion at convergence: 1136.087
## Random effects:
## Groups Name Std.Dev.
## Clutch (Intercept) 1.822
## Residual 6.709
## Number of obs: 171, groups: Clutch, 4
## Fixed Effects:
## (Intercept) FishGenoHom
## 35.3987 0.7016

## Analysis of Deviance Table (Type II Wald chisquare tests)
##
## Response: mvalue
## Chisq Df Pr(>Chisq)
## FishGeno 0.4569 1 0.4991
```

Estimated marginal means with model-based standard errors and 95% confidence limits on the original scale (non-transformed data):

```
## 'emmGrid' object with variables:
## FishGeno = WT, Hom

## FishGeno emmean SE df lower.CL upper.CL
## WT 35.4 1.15 4.38 32.3 38.5
## Hom 36.1 1.19 4.86 33.0 39.2
##
## Degrees-of-freedom method: kenward-roger
## Confidence level used: 0.95
```

## Checking model assumptions

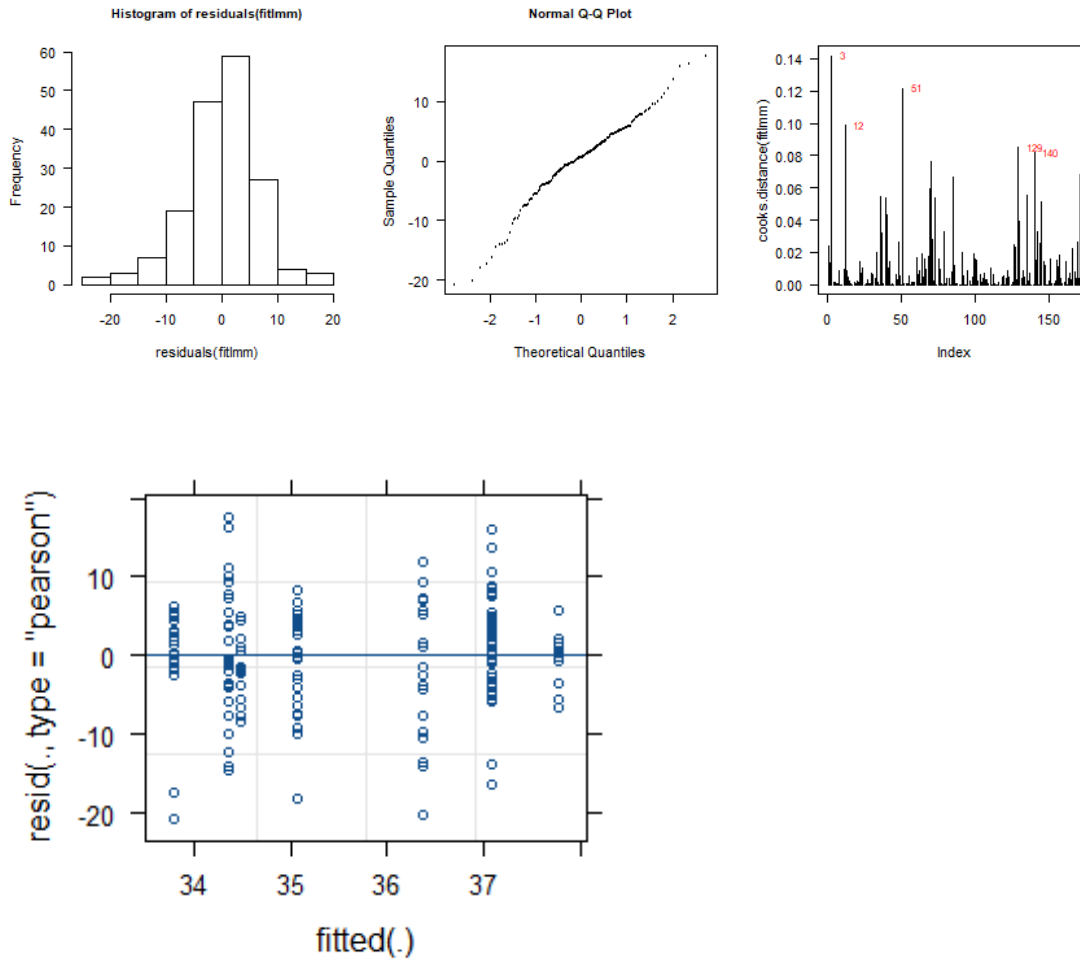

## Conclusion

No significant difference was detected between the two groups (Type II Wald chi-square test;  $n^s p = 0.499$ ). Adj. Pvalue:  $n^s p = 1$  (for Meff = 7.230 tests).

# Analysis across the 10 trials

## Data visualization

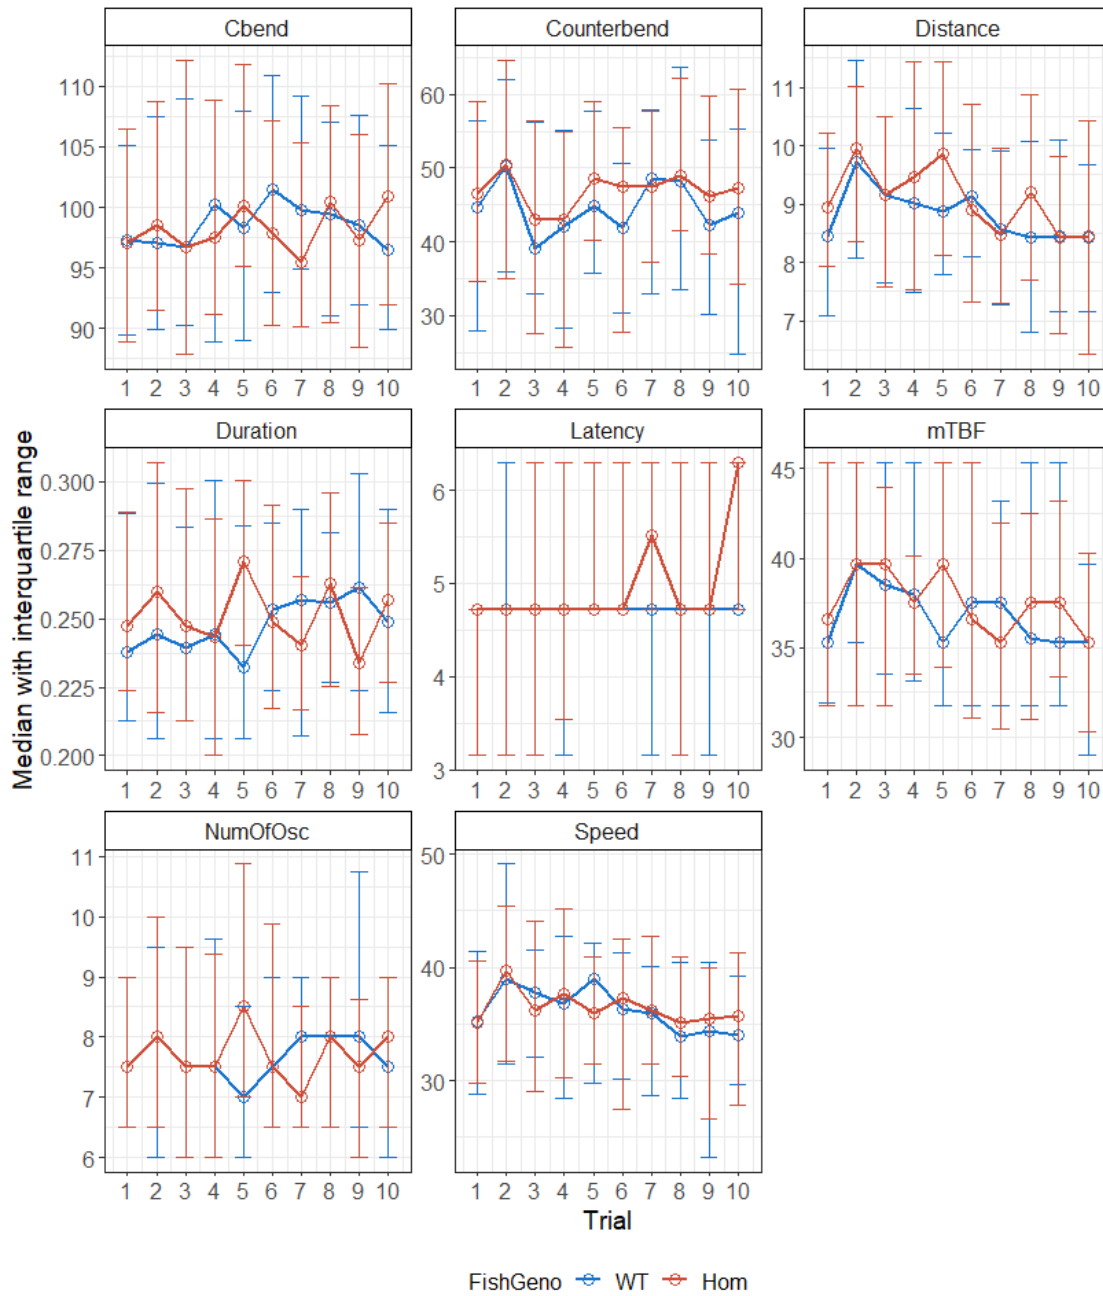



## Data visualization with clutch info

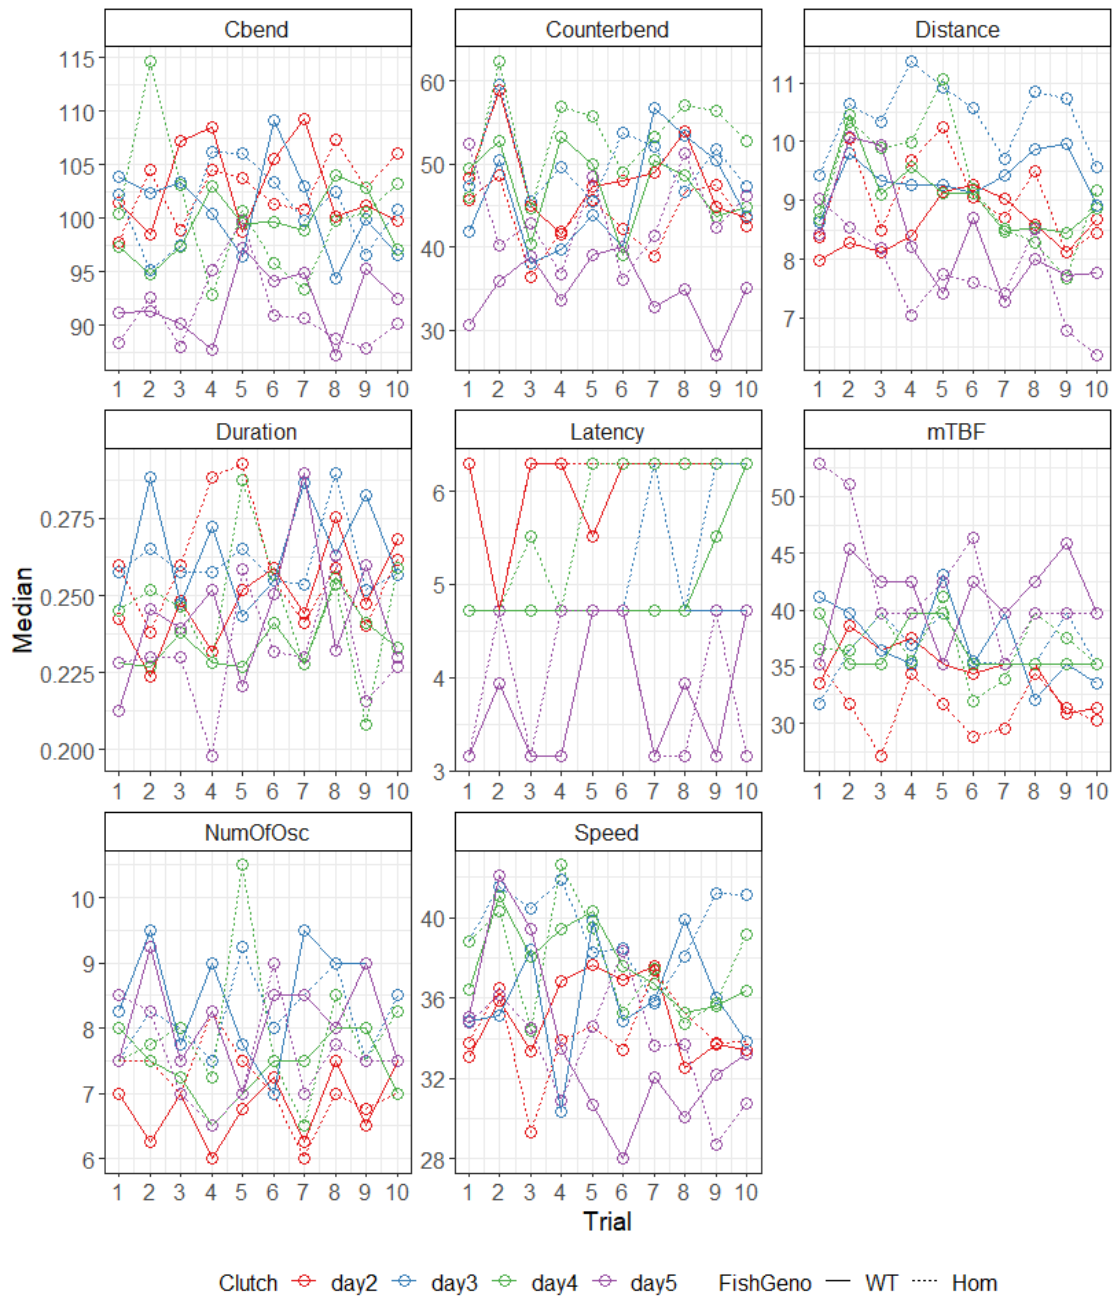

## Correlation matrix

Using Spearman's rank correlations and all the trials:

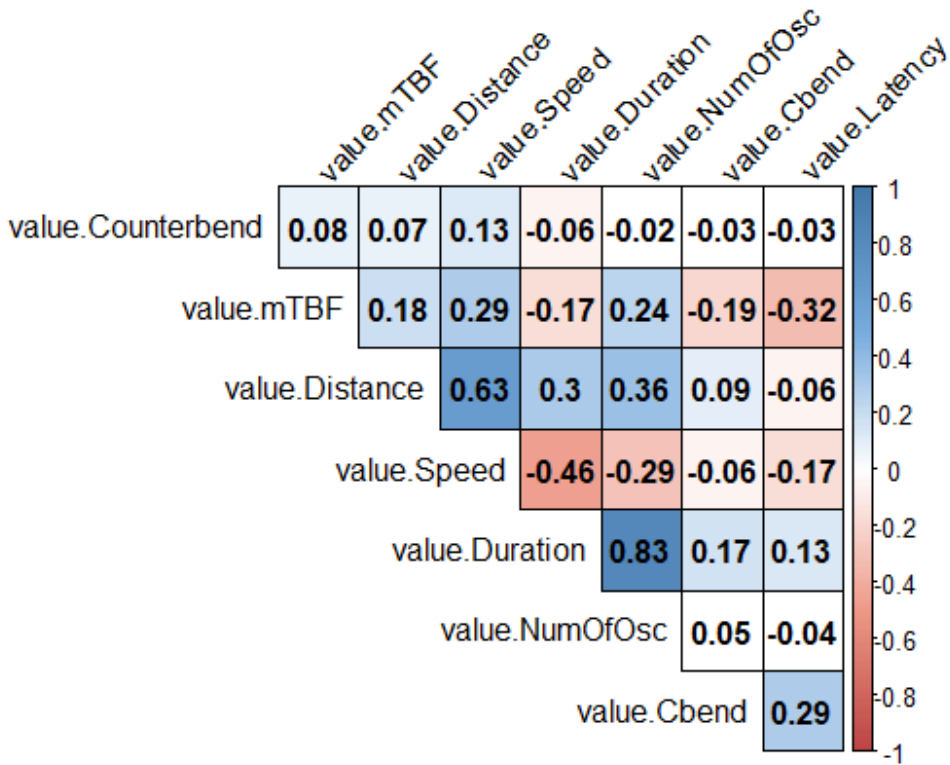

Based on 8 kinetic parameters, variance of eigenvalues of the correlation matrix is 0.622 leading to a  $M_{eff}$  value of 7.456 to be used for multiple testing correction. Method described in Nyholt DR, A simple correction for multiple testing for single-nucleotide polymorphisms in linkage disequilibrium with each other, Am J Hum Genet, 2004 [PMID: 14997420].

## Cbend [ns]

### Fitting LMM

```
## Linear mixed model fit by REML ['lmerMod']
## Formula: value ~ FishGeno * time + (1 | Clutch/Fish)
## Data: tmp
## REML criterion at convergence: 11973.44
## Random effects:
## Groups      Name          Std.Dev.
## Fish:Clutch (Intercept) 3.48
## Clutch      (Intercept) 5.08
## Residual                    12.88
## Number of obs: 1495, groups: Fish:Clutch, 147; Clutch, 4
## Fixed Effects:
##      (Intercept)      FishGenoHom          time  FishGenoHom:time
##      99.53922          1.28642          0.08319          -0.16176

## Analysis of Deviance Table (Type II Wald chisquare tests)
##
## Response: value
##      Chisq Df Pr(>Chisq)
## FishGeno    0.1889 1    0.6638
## time        0.0052 1    0.9428
## FishGeno:time 0.4683 1    0.4938
```

## Group comparison at each trial

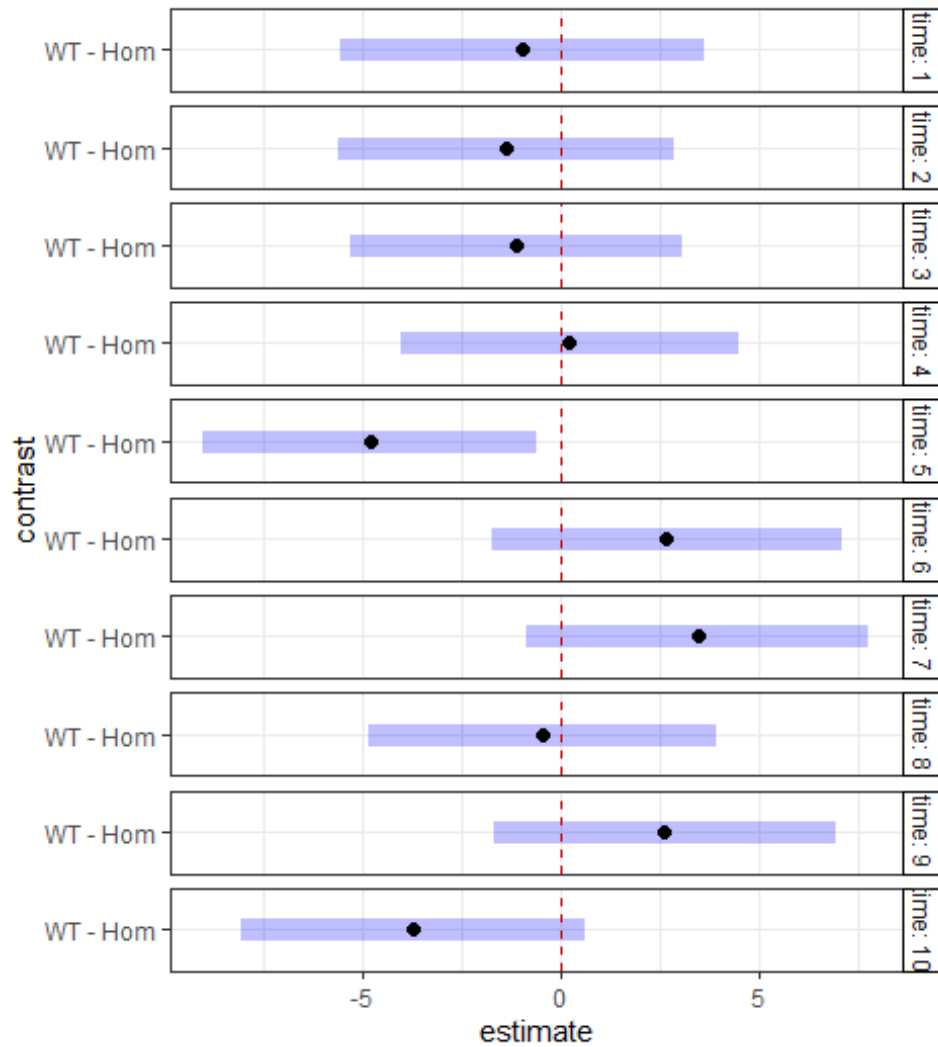

```
##
##
## Table: Post hoc Tukey's: Mean differences between groups at each trial
##
## contrast      time      estimate      SE      df      t.ratio
## p.value
## -----
## WT - Hom      1      -0.9461566  2.350722  1384.246 -0.4024961
## 0.6873811
## WT - Hom      2      -1.3603148  2.164448  1349.969 -0.6284811
## 0.5297951
## WT - Hom      3      -1.0948662  2.133491  1339.268 -0.5131806
## 0.6079096
## WT - Hom      4       0.2279092  2.175144  1356.868  0.1047789
## 0.9165667
```

|                          |    |            |          |          |            |
|--------------------------|----|------------|----------|----------|------------|
| ## WT - Hom<br>0.0255450 | 5  | -4.7921306 | 2.143612 | 1348.704 | -2.2355398 |
| ## WT - Hom<br>0.2334405 | 6  | 2.6865312  | 2.253672 | 1373.360 | 1.1920681  |
| ## WT - Hom<br>0.1149067 | 7  | 3.4692846  | 2.199193 | 1361.850 | 1.5775265  |
| ## WT - Hom<br>0.8426304 | 8  | -0.4427511 | 2.229724 | 1373.390 | -0.1985676 |
| ## WT - Hom<br>0.2288130 | 9  | 2.6471243  | 2.198675 | 1360.646 | 1.2039636  |
| ## WT - Hom<br>0.0929632 | 10 | -3.7267161 | 2.216802 | 1392.952 | -1.6811228 |

## Checking model assumptions

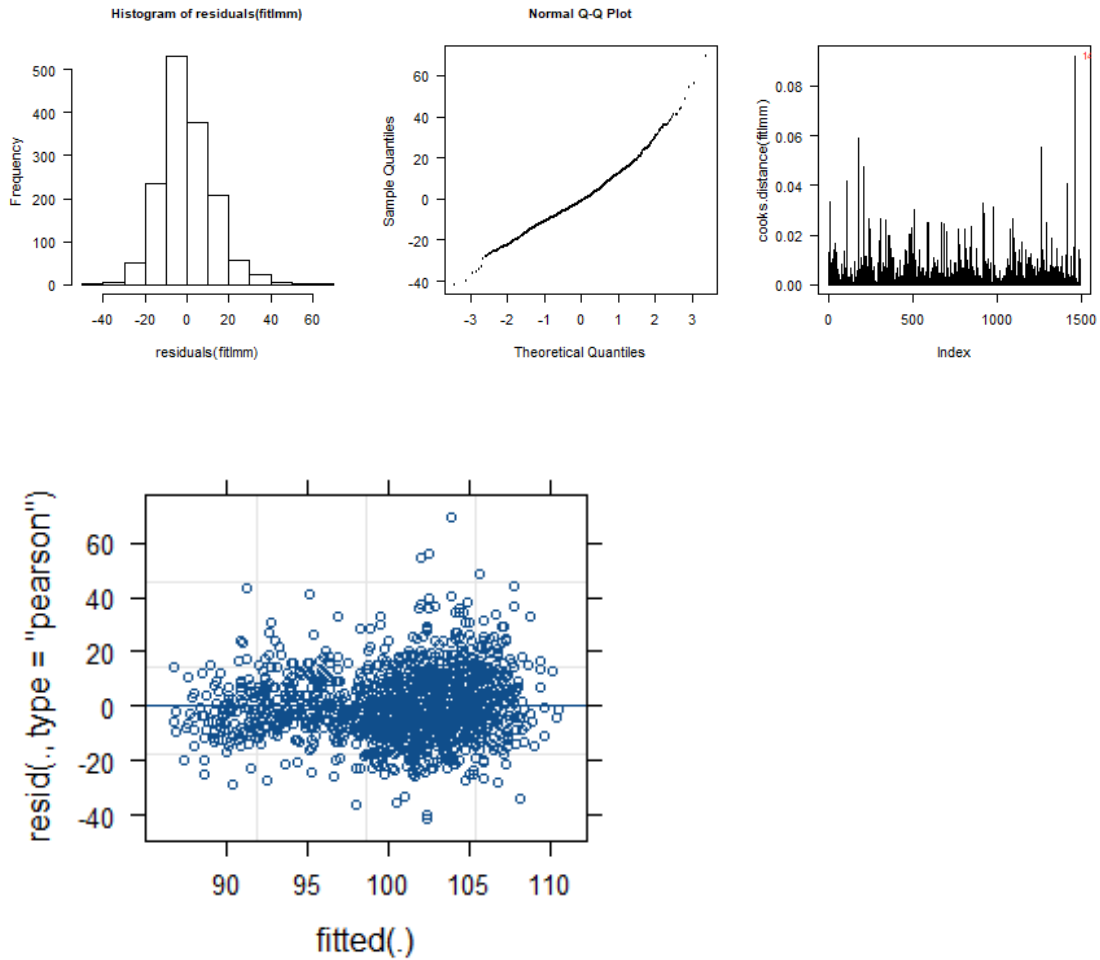

## Conclusion

No significant difference was detected between the two groups (Type II Wald chi-square test;  $n^s p = 0.664$ ). Adj. Pvalue:  $n^s p = 1$  (for Meff = 7.456 tests).

## Counterbend [ns]

### Fitting LMM

```
## Warning in checkConv(attr(opt, "derivs"), opt$par, ctrl =
control$checkConv, :
## Model failed to converge with max|grad| = 0.00202687 (tol = 0.002,
component 1)

## Linear mixed model fit by REML ['lmerMod']
## Formula: value ~ FishGeno * time + (1 | Clutch/Fish)
## Data: tmp
## REML criterion at convergence: 13016.92
## Random effects:
## Groups Name Std.Dev.
## Fish:Clutch (Intercept) 6.541
## Clutch (Intercept) 3.641
## Residual 18.056
## Number of obs: 1495, groups: Fish:Clutch, 147; Clutch, 4
## Fixed Effects:
## (Intercept) FishGenoHom time FishGenoHom:time
## 45.6827 -0.7760 -0.3027 0.5542
## convergence code 0; 1 optimizer warnings; 0 lme4 warnings

## Analysis of Deviance Table (Type II Wald chisquare tests)
##
## Response: value
## Chisq Df Pr(>Chisq)
## FishGeno 2.4433 1 0.11803
## time 0.0793 1 0.77822
## FishGeno:time 2.7922 1 0.09472 .
## ---
## Signif. codes: 0 '***' 0.001 '**' 0.01 '*' 0.05 '.' 0.1 ' ' 1
```

## Group comparison at each trial

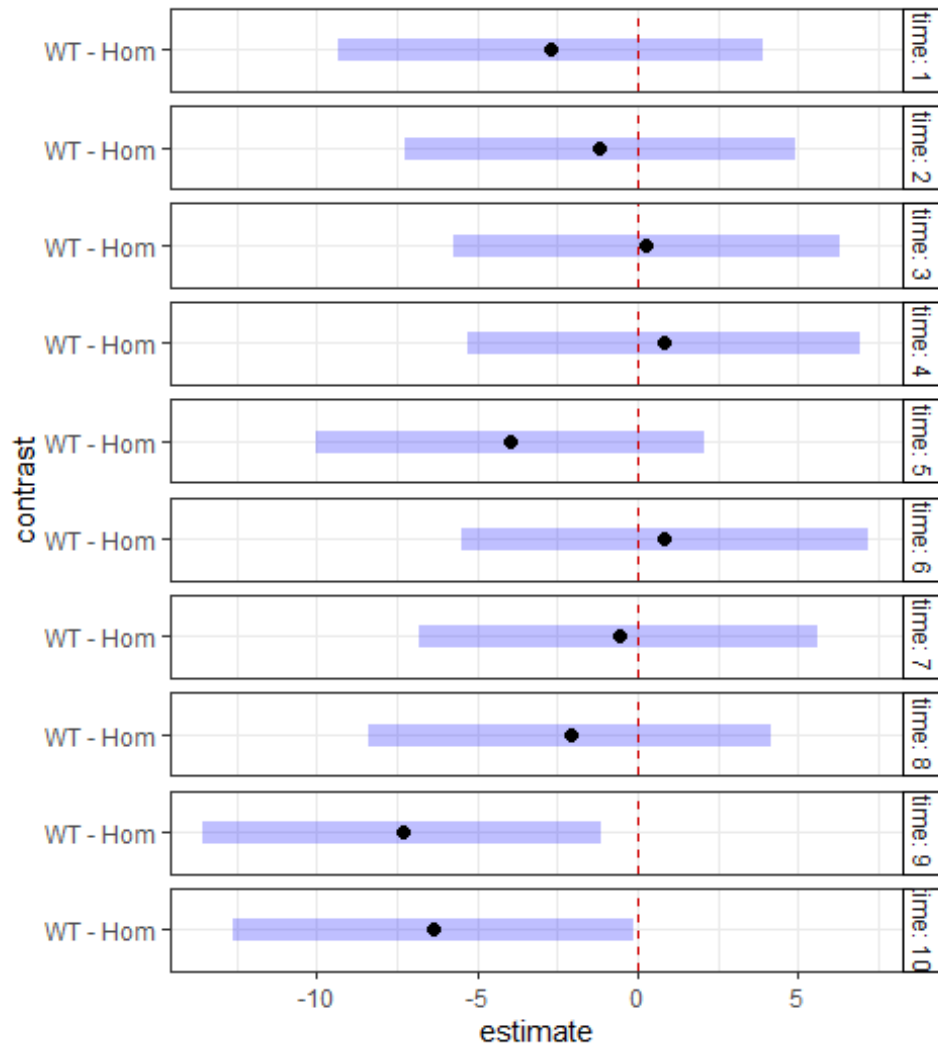

```
##
##
## Table: Post hoc Tukey's: Mean differences between groups at each trial
##
## contrast      time      estimate      SE      df      t.ratio
## p.value
## -----
## WT - Hom      1      -2.6926632   3.368051  1297.083  -0.7994723
## 0.4241630
## WT - Hom      2      -1.1692153   3.110575  1224.261  -0.3758840
## 0.7070683
## WT - Hom      3       0.2756393   3.068539  1207.292   0.0898275
## 0.9284392
## WT - Hom      4       0.8036688   3.124670  1232.753   0.2572012
## 0.7970664
```



|                          |    |            |          |          |            |
|--------------------------|----|------------|----------|----------|------------|
| ## WT - Hom<br>0.1963568 | 5  | -3.9833615 | 3.081405 | 1217.001 | -1.2927097 |
| ## WT - Hom<br>0.7928755 | 6  | 0.8491193  | 3.233092 | 1266.458 | 0.2626338  |
| ## WT - Hom<br>0.8505117 | 7  | -0.5952959 | 3.157987 | 1242.276 | -0.1885049 |
| ## WT - Hom<br>0.5099336 | 8  | -2.1087115 | 3.199241 | 1260.283 | -0.6591286 |
| ## WT - Hom<br>0.0204163 | 9  | -7.3305554 | 3.157560 | 1241.083 | -2.3215889 |
| ## WT - Hom<br>0.0455761 | 10 | -6.3594786 | 3.177737 | 1274.006 | -2.0012604 |

## Checking model assumptions

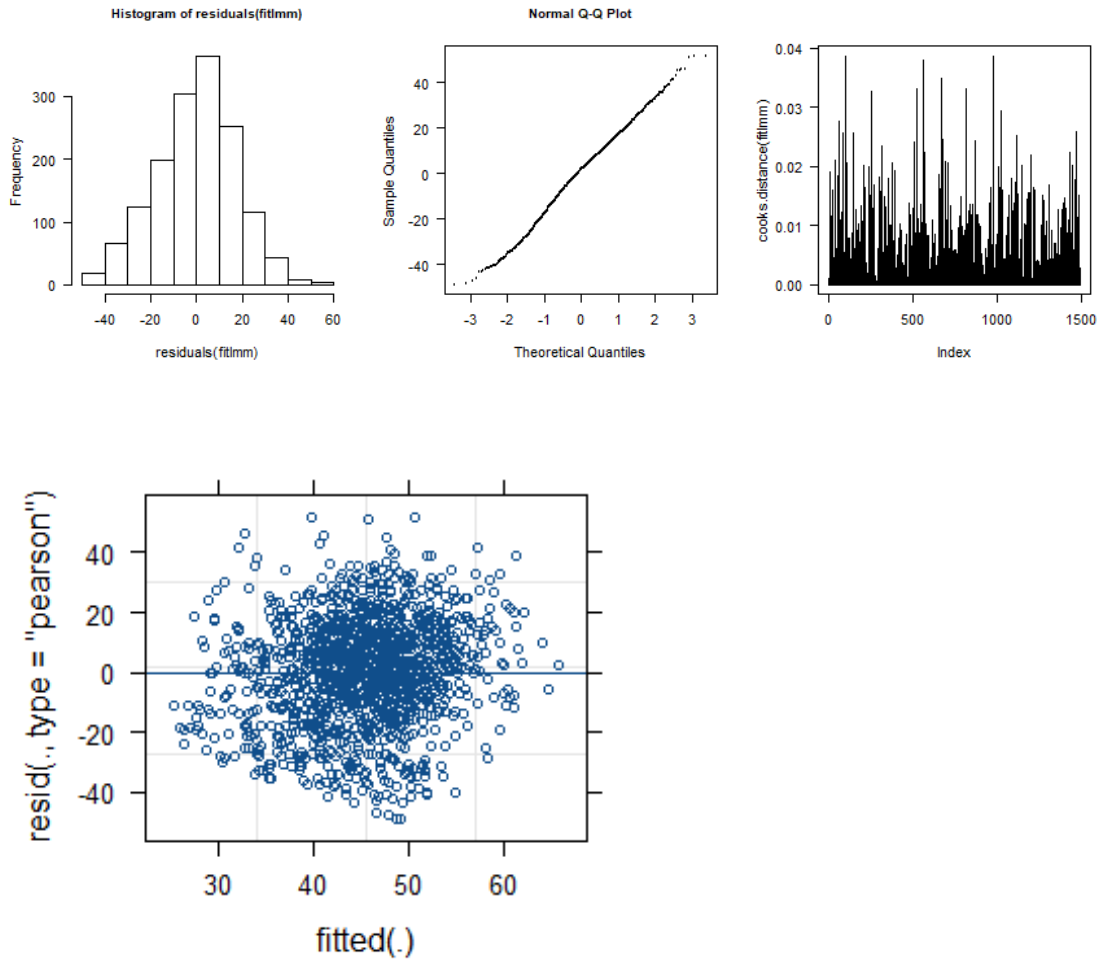

## Conclusion

No significant difference was detected between the two groups (Type II Wald chi-square test;  $n^s p = 0.118$ ). Adj. Pvalue:  $n^s p = 0.880$  (for Meff = 7.456 tests).

## Distance [ns]

### Fitting LMM

```
## Linear mixed model fit by REML ['lmerMod']
## Formula: value ~ FishGeno * time + (1 | Clutch/Fish)
## Data: tmp
## REML criterion at convergence: 6592.135
## Random effects:
## Groups Name Std.Dev.
## Fish:Clutch (Intercept) 1.0864
## Clutch (Intercept) 0.8443
## Residual 2.0418
## Number of obs: 1495, groups: Fish:Clutch, 147; Clutch, 4
## Fixed Effects:
## (Intercept) FishGenoHom time FishGenoHom:time
## 9.27267 0.55450 -0.07998 -0.04471

## Analysis of Deviance Table (Type II Wald chisquare tests)
##
## Response: value
## Chisq Df Pr(>Chisq)
## FishGeno 2.0704 1 0.1502
## time 28.8912 1 7.656e-08 ***
## FishGeno:time 1.4173 1 0.2338
## ---
## Signif. codes: 0 '***' 0.001 '**' 0.01 '*' 0.05 '.' 0.1 ' ' 1
```

## Group comparison at each trial

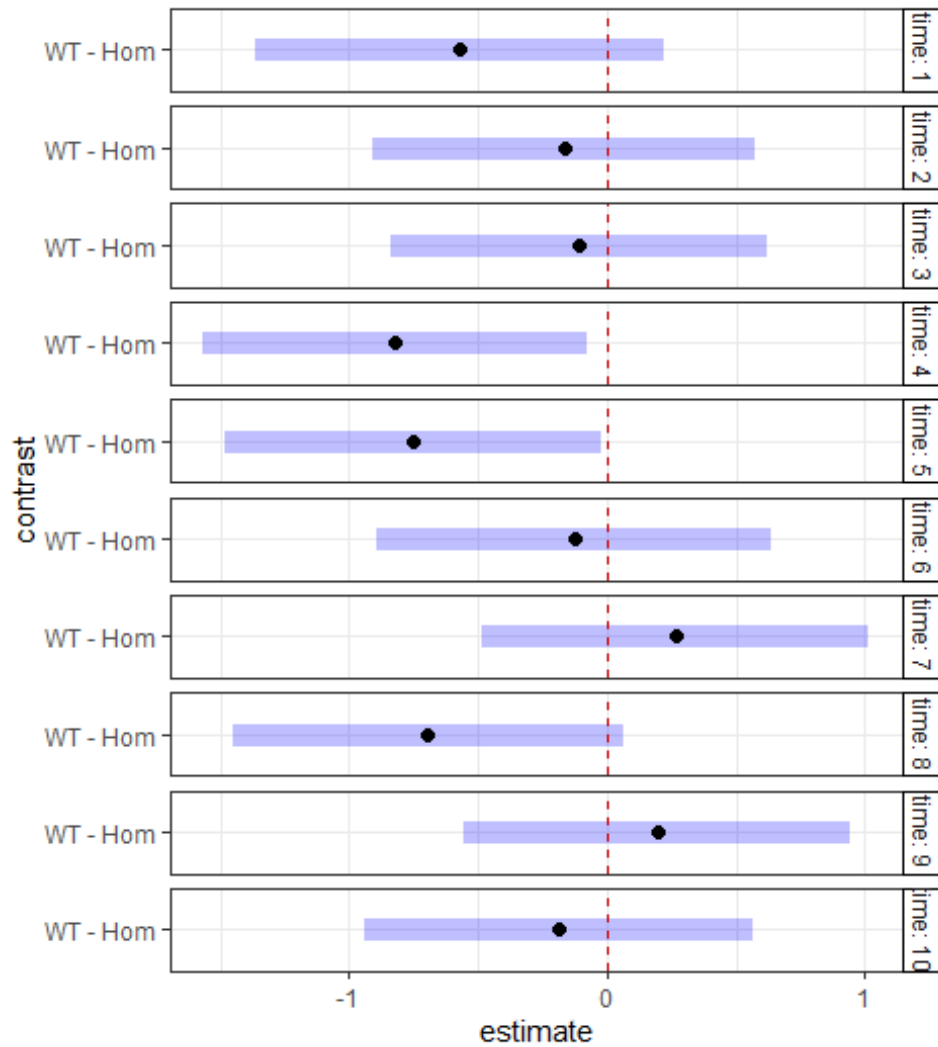

```
##
##
## Table: Post hoc Tukey's: Mean differences between groups at each trial
##
## contrast      time      estimate      SE      df      t.ratio
## p.value
## -----
## WT - Hom      1      -0.5744247  0.4046534  1039.8291 -1.4195473
## 0.1560392
## WT - Hom      2      -0.1666882  0.3766813  920.3871  -0.4425177
## 0.6582186
## WT - Hom      3      -0.1119769  0.3722008  897.9990  -0.3008508
## 0.7635979
## WT - Hom      4      -0.8228512  0.3781269  929.0854  -2.1761242
## 0.0297973
```

|                          |    |            |           |          |            |
|--------------------------|----|------------|-----------|----------|------------|
| ## WT - Hom<br>0.0441179 | 5  | -0.7528559 | 0.3734817 | 906.6431 | -2.0157772 |
| ## WT - Hom<br>0.7408719 | 6  | -0.1289702 | 0.3898825 | 981.0622 | -0.3307924 |
| ## WT - Hom<br>0.4906773 | 7  | 0.2632344  | 0.3817751 | 944.1813 | 0.6895013  |
| ## WT - Hom<br>0.0722817 | 8  | -0.6947643 | 0.3861286 | 966.7891 | -1.7993079 |
| ## WT - Hom<br>0.6115910 | 9  | 0.1939219  | 0.3817563 | 943.3995 | 0.5079731  |
| ## WT - Hom<br>0.6289247 | 10 | -0.1853175 | 0.3833664 | 965.7667 | -0.4833952 |

## Checking model assumptions

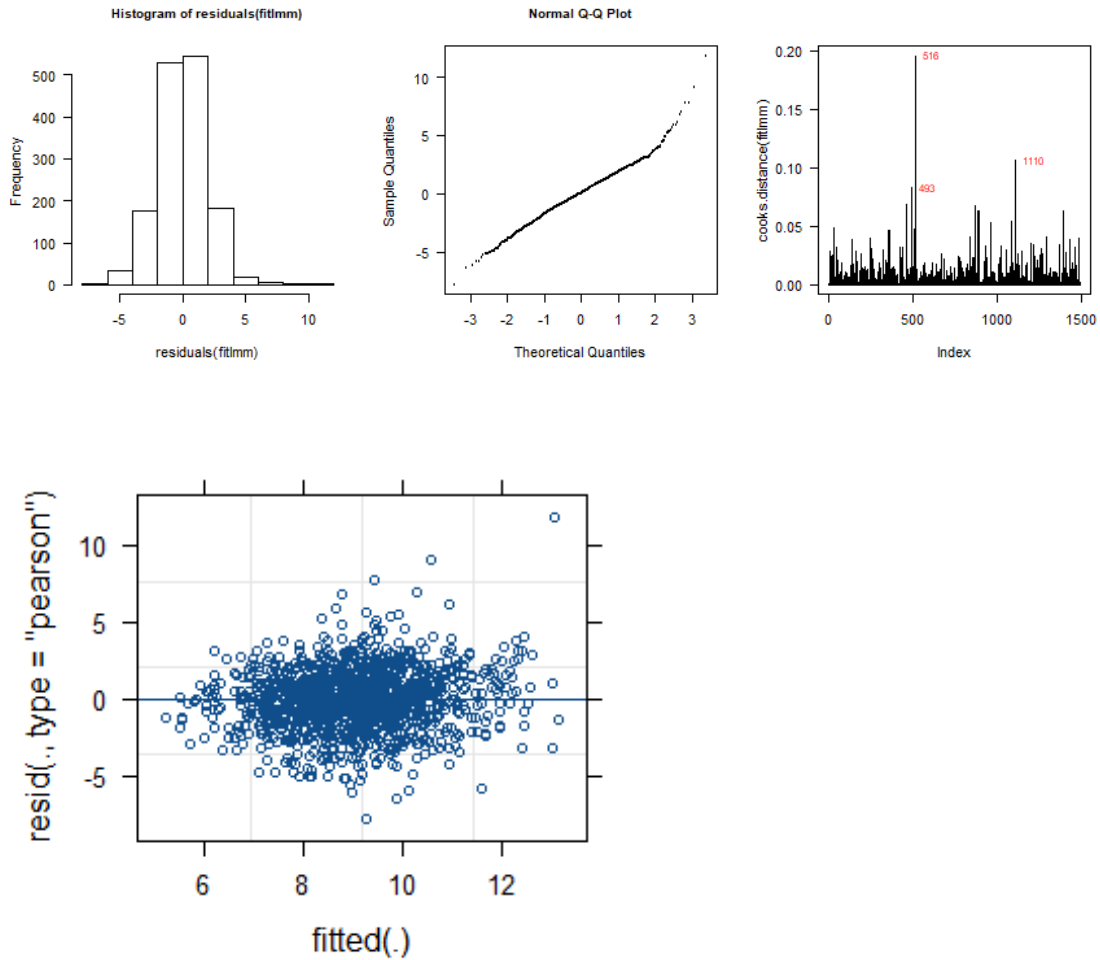

## Conclusion

No significant difference was detected between the two groups (Type II Wald chi-square test;  $n_s p = 0.150$ ). Adj. Pvalue:  $n_s p = 1$  (for  $M_{eff} = 7.456$  tests). Significant effect of trial (Type II Wald chi-square test;  $n_s p = 7.7e-8$ ). Adj. Pvalue:  $***p = 5.7e-7$  (for  $M_{eff} = 7.456$  tests).

## Duration [sqrt, ns]

### Fitting LMM

```
## Linear mixed model fit by REML ['lmerMod']
## Formula: sqrt(value) ~ FishGeno * time + (1 | Clutch/Fish)
## Data: tmp
## REML criterion at convergence: -3749.684
## Random effects:
## Groups Name Std.Dev.
## Fish:Clutch (Intercept) 0.04500
## Clutch (Intercept) 0.01756
## Residual 0.06226
## Number of obs: 1495, groups: Fish:Clutch, 147; Clutch, 4
## Fixed Effects:
## (Intercept) FishGenoHom time FishGenoHom:time
## 0.505666 0.004041 0.001381 -0.001818

## Analysis of Deviance Table (Type II Wald chisquare tests)
##
## Response: sqrt(value)
## Chisq Df Pr(>Chisq)
## FishGeno 0.5334 1 0.4652
## time 0.8942 1 0.3443
## FishGeno:time 2.5174 1 0.1126
```

## Group comparison at each trial

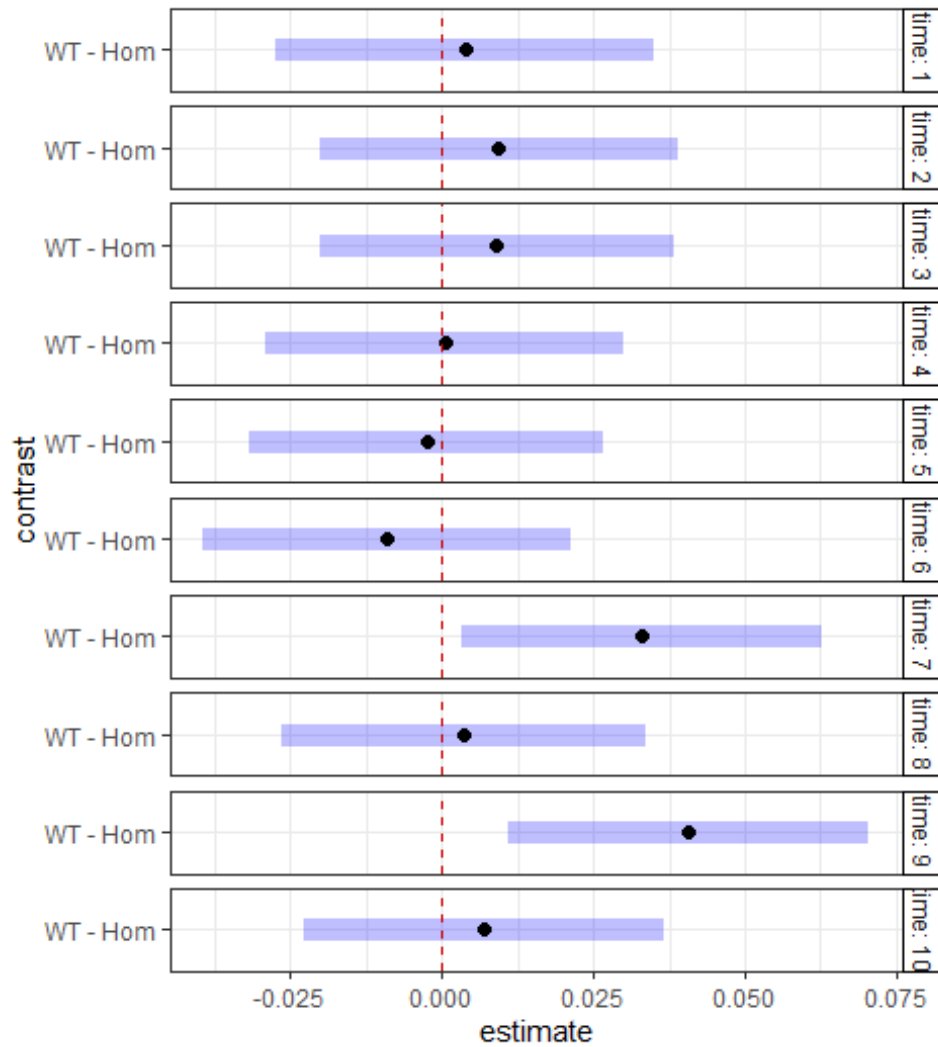

```
##
##
## Table: Post hoc Tukey's: Mean differences between groups at each trial
##
## contrast      time      estimate      SE      df      t.ratio
## p.value
## -----
## WT - Hom      1      0.0039350    0.0158774    680.7208    0.2478385
## 0.8043341
## WT - Hom      2      0.0094118    0.0149821    578.1665    0.6282011
## 0.5301203
## WT - Hom      3      0.0090667    0.0148419    561.8553    0.6108859
## 0.5415222
## WT - Hom      4      0.0005141    0.0150262    583.7883    0.0342115
## 0.9727202
```



|                          |    |            |           |          |            |
|--------------------------|----|------------|-----------|----------|------------|
| ## WT - Hom<br>0.8707985 | 5  | -0.0024212 | 0.0148797 | 566.7633 | -0.1627180 |
| ## WT - Hom<br>0.5602774 | 6  | -0.0089754 | 0.0154020 | 626.6782 | -0.5827408 |
| ## WT - Hom<br>0.0297199 | 7  | 0.0329990  | 0.0151439 | 596.5782 | 2.1790312  |
| ## WT - Hom<br>0.8096078 | 8  | 0.0036830  | 0.0152800 | 613.2545 | 0.2410359  |
| ## WT - Hom<br>0.0074983 | 9  | 0.0406323  | 0.0151442 | 596.4503 | 2.6830283  |
| ## WT - Hom<br>0.6467895 | 10 | 0.0069605  | 0.0151824 | 605.2845 | 0.4584559  |

## Checking model assumptions

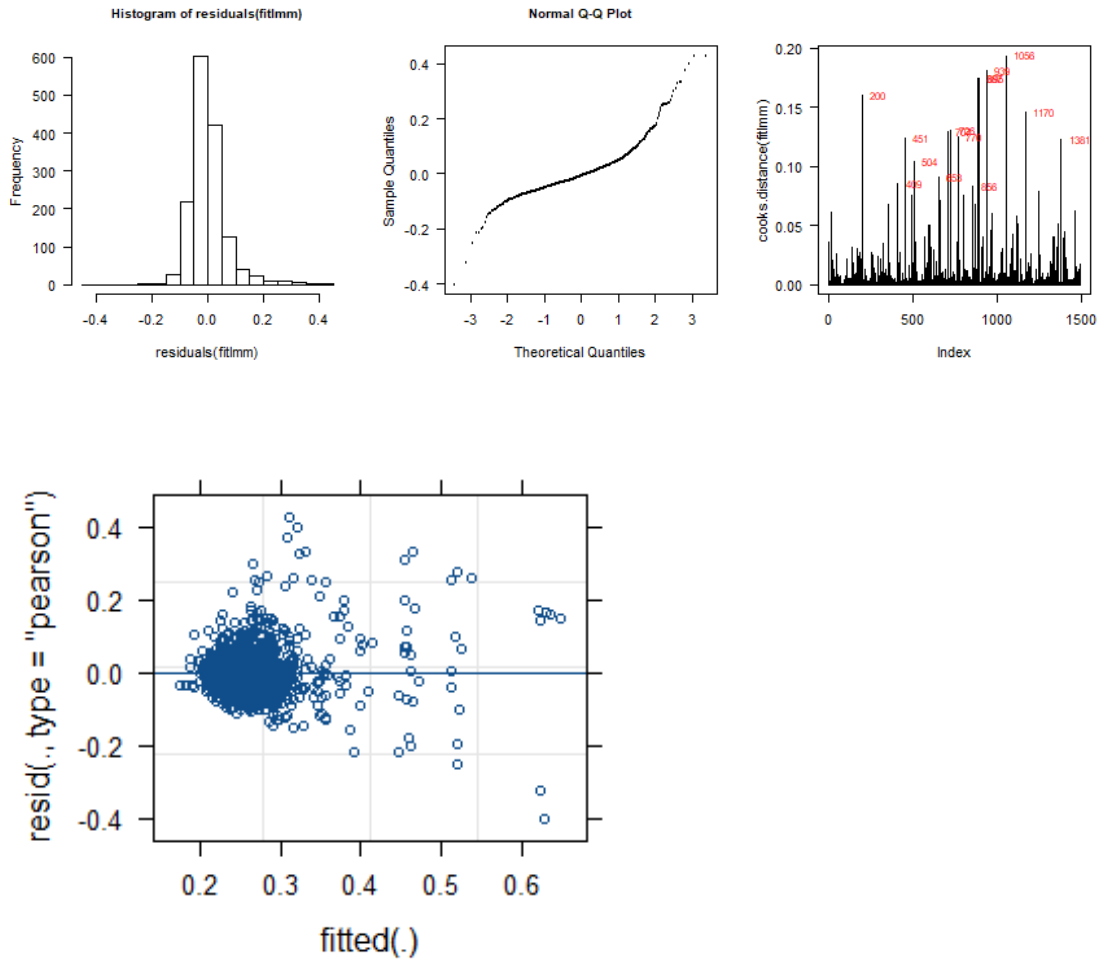

## Conclusion

No significant difference was detected between the two groups (Type II Wald chi-square test;  $n^s p = 0.465$ ). Adj. Pvalue:  $n^s p = 1$  (for Meff = 7.456 tests).

## Latency [ns]

### Fitting LMM

```
## Linear mixed model fit by REML ['lmerMod']
## Formula: value ~ FishGeno * time + (1 | Clutch/Fish)
## Data: tmp
## REML criterion at convergence: 5584.152
## Random effects:
## Groups Name Std.Dev.
## Fish:Clutch (Intercept) 0.8489
## Clutch (Intercept) 1.0080
## Residual 1.4444
## Number of obs: 1495, groups: Fish:Clutch, 147; Clutch, 4
## Fixed Effects:
## (Intercept) FishGenoHom time FishGenoHom:time
## 4.74014 0.20958 0.05271 0.02903

## Analysis of Deviance Table (Type II Wald chisquare tests)
##
## Response: value
## Chisq Df Pr(>Chisq)
## FishGeno 5.1803 1 0.02284 *
## time 24.9038 1 6.026e-07 ***
## FishGeno:time 1.1931 1 0.27471
## ---
## Signif. codes: 0 '***' 0.001 '**' 0.01 '*' 0.05 '.' 0.1 ' ' 1
```

## Group comparison at each trial

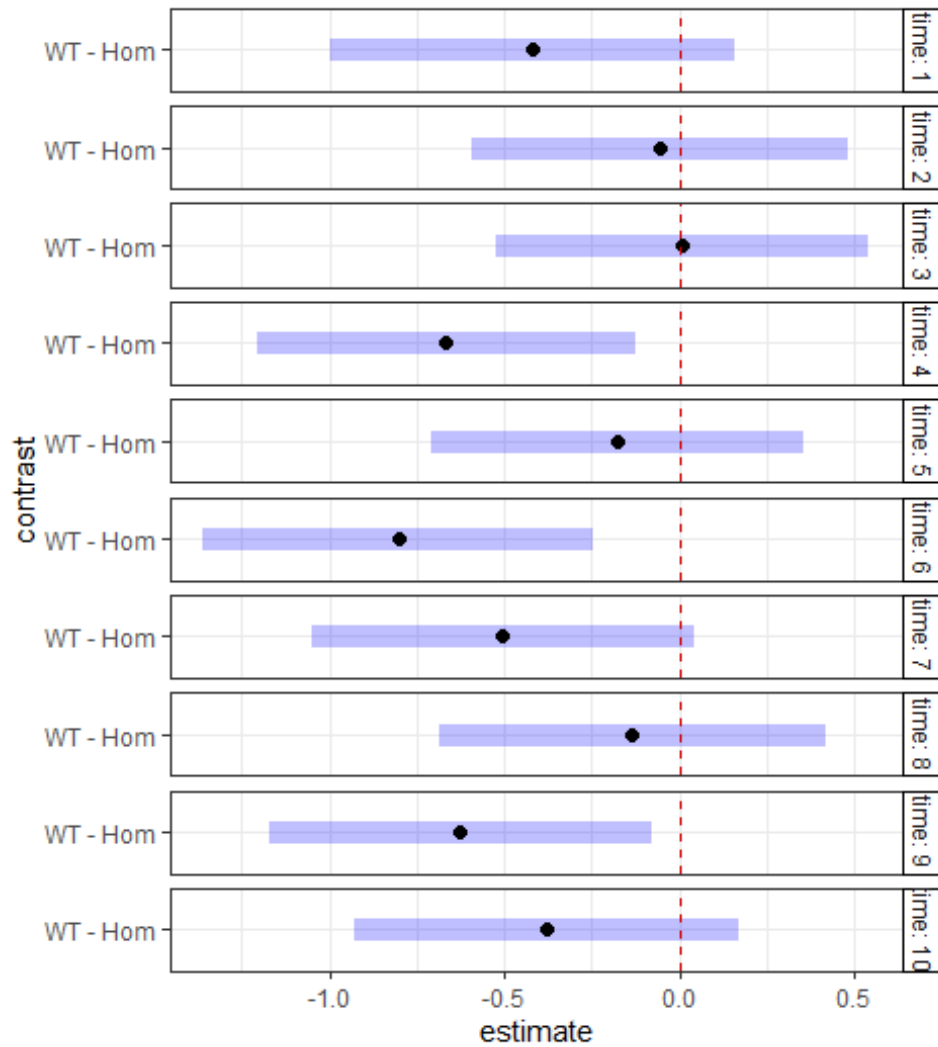

```
##
##
## Table: Post hoc Tukey's: Mean differences between groups at each trial
##
## contrast      time      estimate      SE      df      t.ratio
## p.value
## -----
## WT - Hom      1      -0.4191059  0.2942862  954.7892  -1.4241440
## 0.1547315
## WT - Hom      2      -0.0551944  0.2746788  832.8438  -0.2009416
## 0.8407933
## WT - Hom      3       0.0078746  0.2715509  810.9336  0.0289985
## 0.9768729
## WT - Hom      4      -0.6679505  0.2756796  841.0108  -2.4229232
## 0.0156064
```

|                          |    |            |           |          |            |
|--------------------------|----|------------|-----------|----------|------------|
| ## WT - Hom<br>0.5173105 | 5  | -0.1764765 | 0.2724339 | 818.8694 | -0.6477774 |
| ## WT - Hom<br>0.0048113 | 6  | -0.8024799 | 0.2839149 | 893.3670 | -2.8264800 |
| ## WT - Hom<br>0.0703191 | 7  | -0.5042061 | 0.2782424 | 856.3602 | -1.8121114 |
| ## WT - Hom<br>0.6299020 | 8  | -0.1355836 | 0.2812741 | 878.3543 | -0.4820338 |
| ## WT - Hom<br>0.0247544 | 9  | -0.6257956 | 0.2782323 | 855.7177 | -2.2491840 |
| ## WT - Hom<br>0.1732773 | 10 | -0.3806198 | 0.2792801 | 874.4088 | -1.3628605 |

## Checking model assumptions

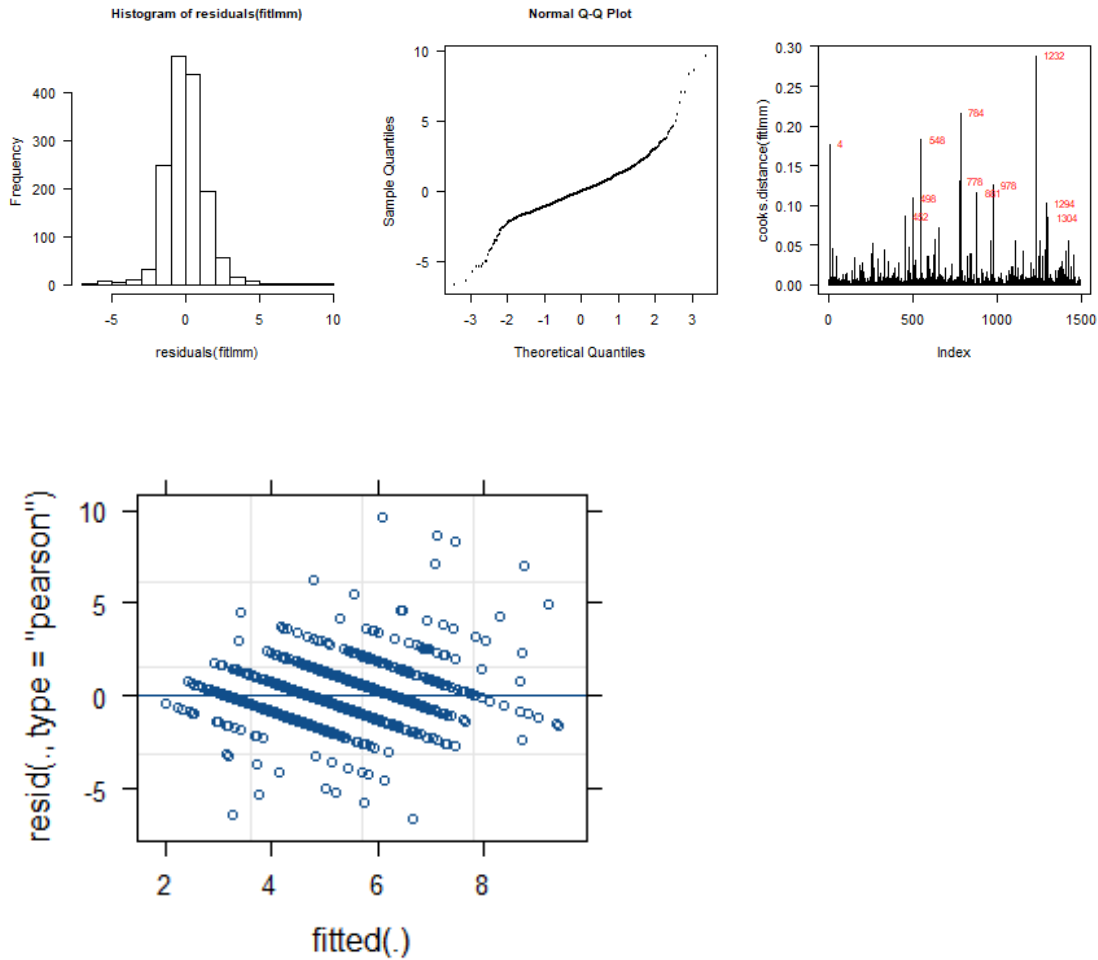

## Conclusion

Linear mixed model indicated a significant difference between the two groups (Type II test chi-square test; \* $p = 0.023$ ). Adj. Pvalue:  $^{ns}p = 0.170$  (using  $M_{eff} = 7.456$  tests). Significant effect of trial (Type II test chi-square test; \*\*\* $p = 6.0e-7$ ). Adj. Pvalue: \*\*\* $p = 4.5e-6$ . But no interaction between trial and genotype (Type II test chi-square test;  $^{ns}p = 0.275$ ). Adj. Pvalue:  $^{ns}p = 1$ .

## mTBF [ns]

### Fitting LMM

```
## Linear mixed model fit by REML ['lmerMod']
## Formula: value ~ FishGeno * time + (1 | Clutch/Fish)
## Data: tmp
## REML criterion at convergence: 10356.23
## Random effects:
## Groups Name Std.Dev.
## Fish:Clutch (Intercept) 3.376
## Clutch (Intercept) 4.199
## Residual 7.277
## Number of obs: 1495, groups: Fish:Clutch, 147; Clutch, 4
## Fixed Effects:
## (Intercept) FishGenoHom time FishGenoHom:time
## 39.02143 0.03436 -0.15878 -0.08045

## Analysis of Deviance Table (Type II Wald chisquare tests)
##
## Response: value
## Chisq Df Pr(>Chisq)
## FishGeno 0.3545 1 0.551570
## time 8.6308 1 0.003305 **
## FishGeno:time 0.3616 1 0.547630
## ---
## Signif. codes: 0 '***' 0.001 '**' 0.01 '*' 0.05 '.' 0.1 ' ' 1
```

## Group comparison at each trial

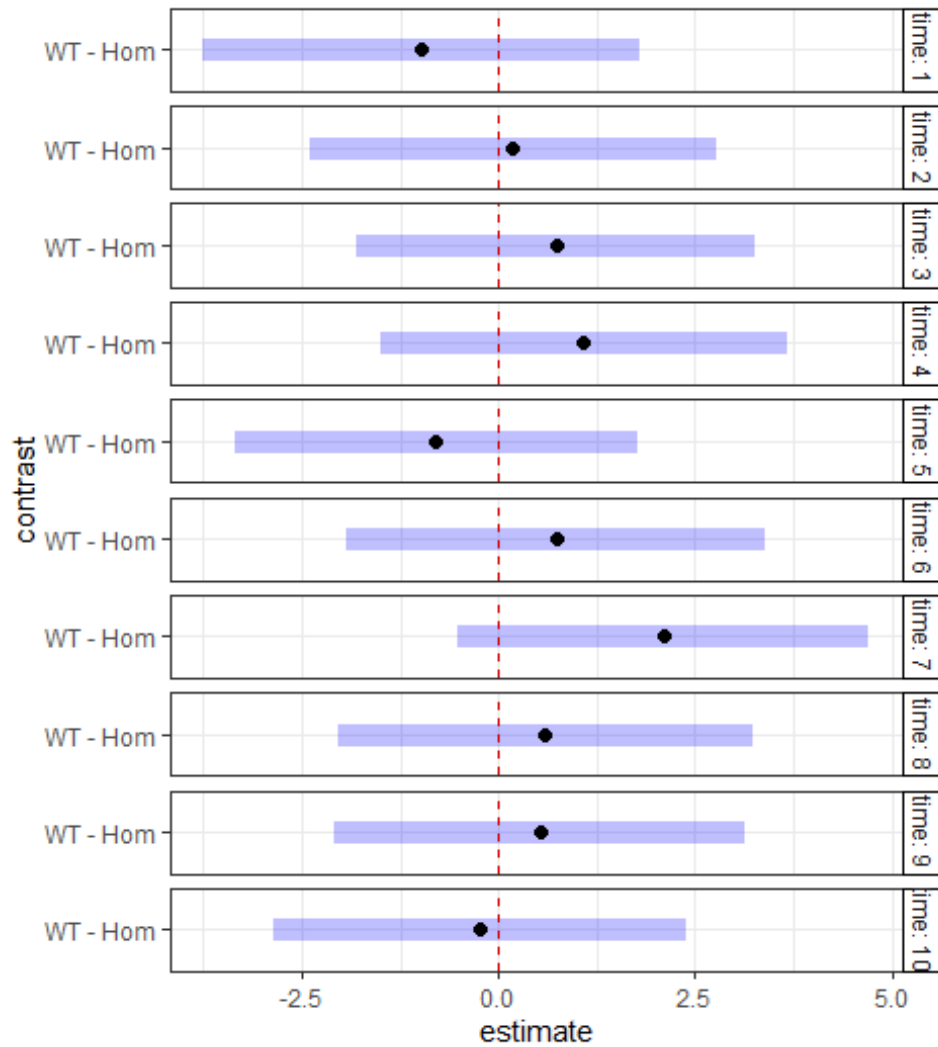

```
##
##
## Table: Post hoc Tukey's: Mean differences between groups at each trial
##
## contrast      time      estimate      SE      df      t.ratio
## p.value
## -----
## WT - Hom      1      -0.9734106  1.413502  1159.971 -0.6886517
## 0.4911802
## WT - Hom      2       0.1873990  1.310815  1054.264  0.1429637
## 0.8863462
## WT - Hom      3       0.7325100  1.294222  1032.464  0.5659846
## 0.5715272
## WT - Hom      4       1.0800108  1.316239  1063.311  0.8205277
## 0.4120992
```



|                          |    |            |          |          |            |
|--------------------------|----|------------|----------|----------|------------|
| ## WT - Hom<br>0.5433227 | 5  | -0.7898452 | 1.299096 | 1042.242 | -0.6079959 |
| ## WT - Hom<br>0.5923570 | 6  | 0.7280732  | 1.359414 | 1110.099 | 0.5355787  |
| ## WT - Hom<br>0.1158858 | 7  | 2.0921642  | 1.329584 | 1076.796 | 1.5735478  |
| ## WT - Hom<br>0.6597854 | 8  | 0.5925692  | 1.345742 | 1098.578 | 0.4403290  |
| ## WT - Hom<br>0.6926109 | 9  | 0.5256992  | 1.329468 | 1075.630 | 0.3954207  |
| ## WT - Hom<br>0.8531761 | 10 | -0.2473383 | 1.336163 | 1103.474 | -0.1851109 |

## Checking model assumptions

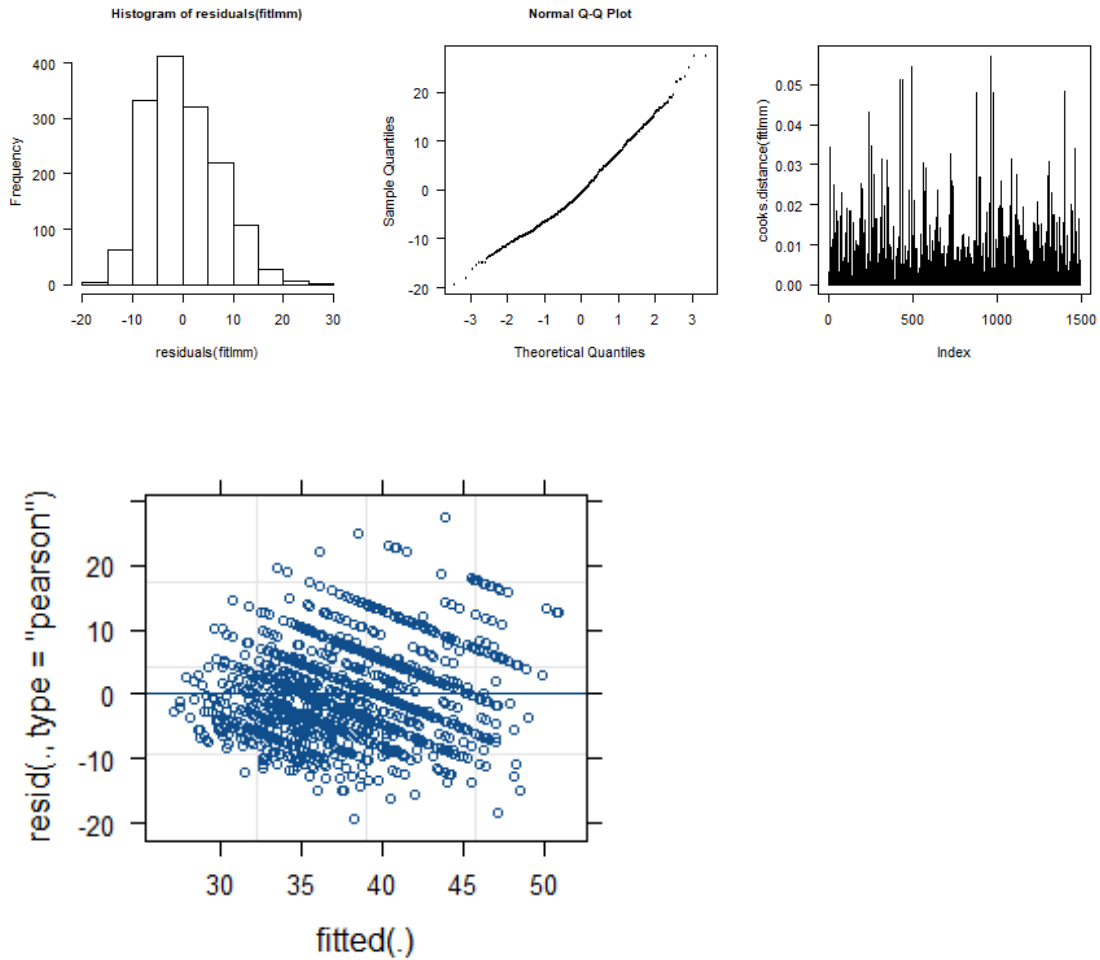

## Conclusion

No significant difference was detected between the two groups (Type II Wald chi-square test;  $^{ns}p = 0.552$ ). Adj. Pvalue:  $^{ns}p = 1$  (for  $Meff = 7.456$  tests). Significant effect of trial (Type II Wald chi-square test;  $^{**}p = 3.3e-3$ ). Adj. Pvalue:  $^{*}p = 0.025$  (for  $Meff = 7.456$  tests).

## Number of oscillations [ns]

### Fitting LMM

```
## Linear mixed model fit by REML ['lmerMod']
## Formula: value ~ FishGeno * time + (1 | Clutch/Fish)
## Data: tmp
## REML criterion at convergence: 7487.87
## Random effects:
## Groups Name Std.Dev.
## Fish:Clutch (Intercept) 1.6056
## Clutch (Intercept) 0.6045
## Residual 2.7415
## Number of obs: 1495, groups: Fish:Clutch, 147; Clutch, 4
## Fixed Effects:
## (Intercept) FishGenoHom time FishGenoHom:time
## 8.29158 0.09926 0.02233 -0.06845

## Analysis of Deviance Table (Type II Wald chisquare tests)
##
## Response: value
## Chisq Df Pr(>Chisq)
## FishGeno 0.8302 1 0.3622
## time 0.1371 1 0.7111
## FishGeno:time 1.8414 1 0.1748
```

## Group comparison at each trial

```
## Warning in checkConv(attr(opt, "derivs"), opt$par, ctrl =
control$checkConv, :
## Model failed to converge with max|grad| = 0.00422999 (tol = 0.002,
component 1)
```

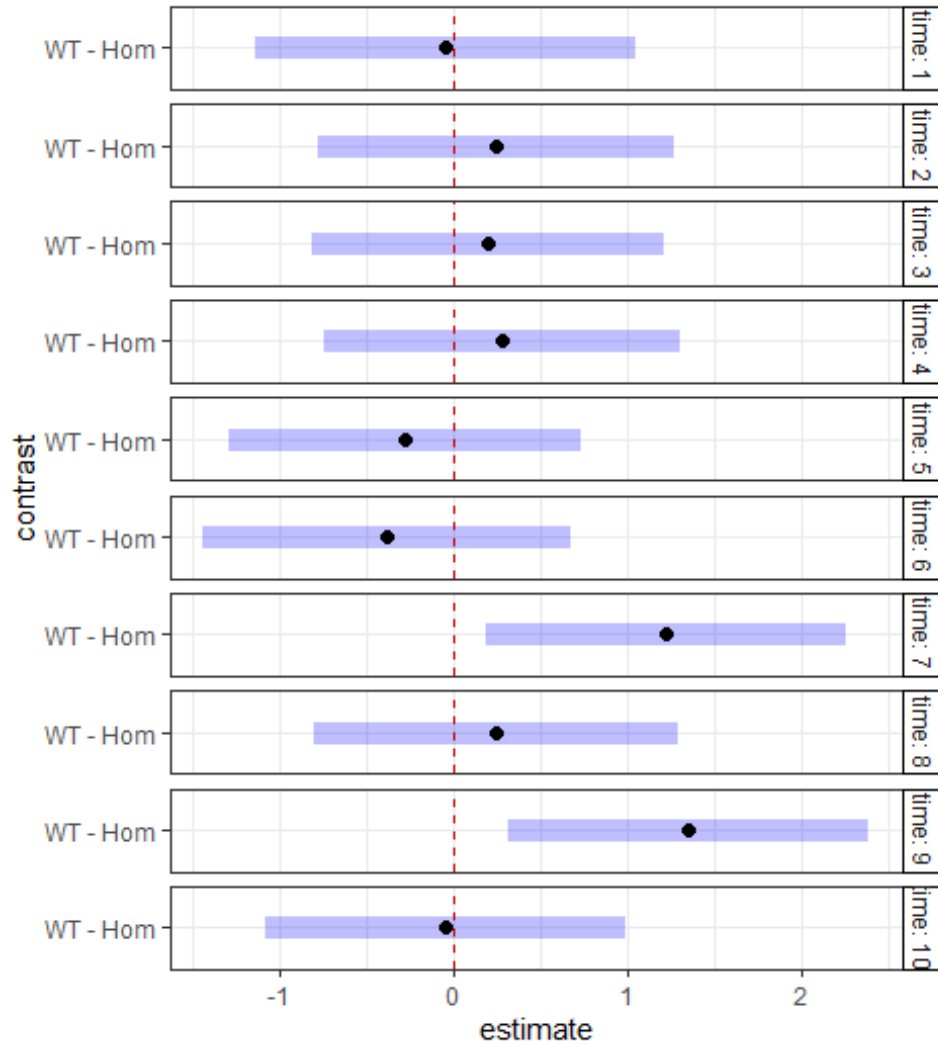

```
##
##
## Table: Post hoc Tukey's: Mean differences between groups at each trial
##
## contrast      time      estimate      SE      df      t.ratio
p.value
## -----
## WT - Hom      1      -0.0403670  0.5575297  964.1214 -0.0724032
0.9422960
## WT - Hom      2       0.2431884  0.5204058  841.6949  0.4673055
0.6404023
```

|                          |    |            |           |          |            |
|--------------------------|----|------------|-----------|----------|------------|
| ## WT - Hom<br>0.7031576 | 3  | 0.1961259  | 0.5145035 | 820.0168 | 0.3811945  |
| ## WT - Hom<br>0.5941644 | 4  | 0.2783928  | 0.5223010 | 849.9094 | 0.5330123  |
| ## WT - Hom<br>0.5858308 | 5  | -0.2813587 | 0.5161586 | 827.6511 | -0.5451011 |
| ## WT - Hom<br>0.4788645 | 6  | -0.3810672 | 0.5379080 | 902.8423 | -0.7084246 |
| ## WT - Hom<br>0.0204093 | 7  | 1.2245822  | 0.5271519 | 865.2882 | 2.3230156  |
| ## WT - Hom<br>0.6495116 | 8  | 0.2422537  | 0.5328998 | 887.6266 | 0.4545953  |
| ## WT - Hom<br>0.0104408 | 9  | 1.3529076  | 0.5271440 | 864.8153 | 2.5664856  |
| ## WT - Hom<br>0.9317906 | 10 | -0.0453025 | 0.5291317 | 883.7638 | -0.0856166 |

## Checking model assumptions

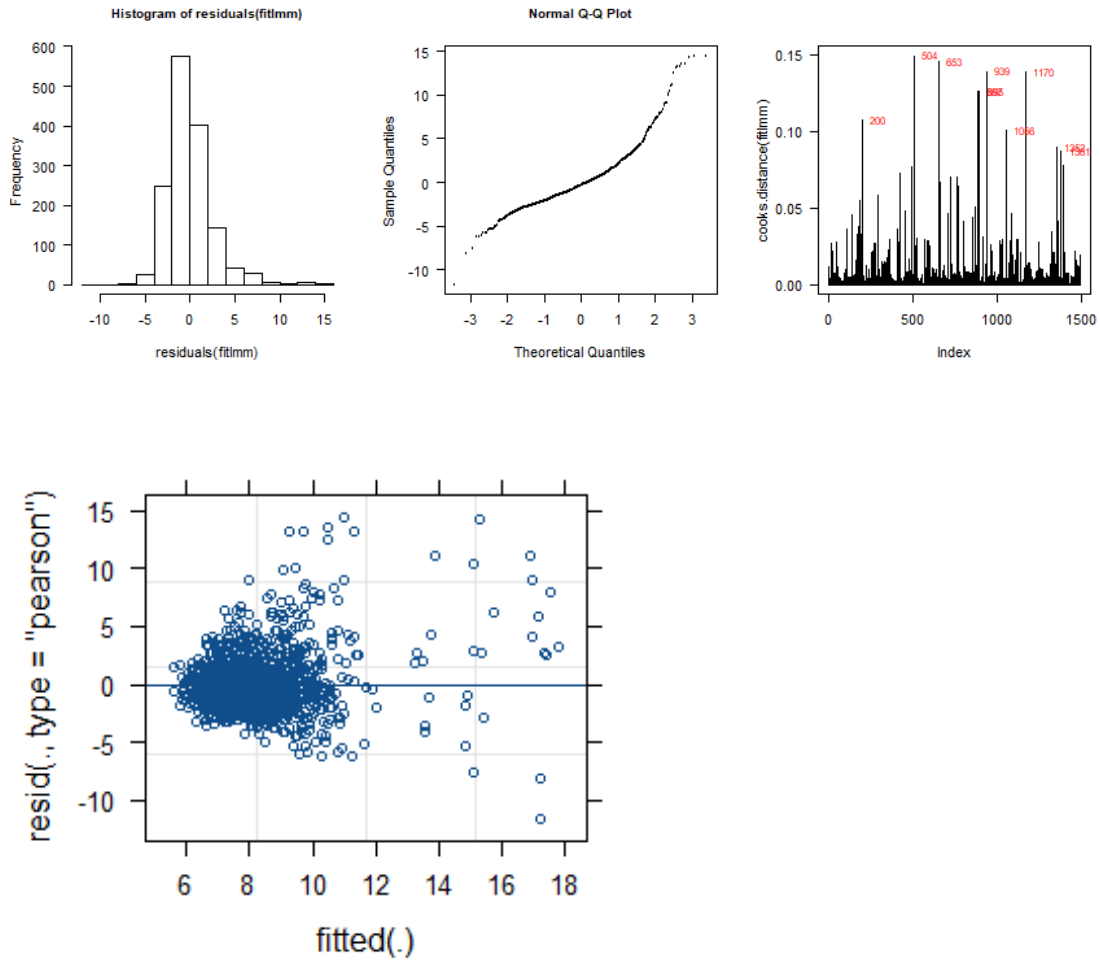

## Conclusion

No significant difference was detected between the two groups (Type II Wald chi-square test;  $n^s p = 0.362$ ). Adj. Pvalue:  $n^s p = 1$  (for Meff = 7.456 tests).

## Speed [ns]

### Fitting LMM

```
## Linear mixed model fit by REML ['lmerMod']
## Formula: value ~ FishGeno * time + (1 | Clutch/Fish)
## Data: tmp
## REML criterion at convergence: 11125.9
## Random effects:
## Groups Name Std.Dev.
## Fish:Clutch (Intercept) 5.888
## Clutch (Intercept) 2.041
## Residual 9.226
## Number of obs: 1495, groups: Fish:Clutch, 147; Clutch, 4
## Fixed Effects:
## (Intercept) FishGenoHom time FishGenoHom:time
## 38.03022 0.69723 -0.50099 0.05298

## Analysis of Deviance Table (Type II Wald chisquare tests)
##
## Response: value
## Chisq Df Pr(>Chisq)
## FishGeno 0.8035 1 0.3701
## time 31.6810 1 1.817e-08 ***
## FishGeno:time 0.0974 1 0.7550
## ---
## Signif. codes: 0 '***' 0.001 '**' 0.01 '*' 0.05 '.' 0.1 ' ' 1
```

## Group comparison at each trial

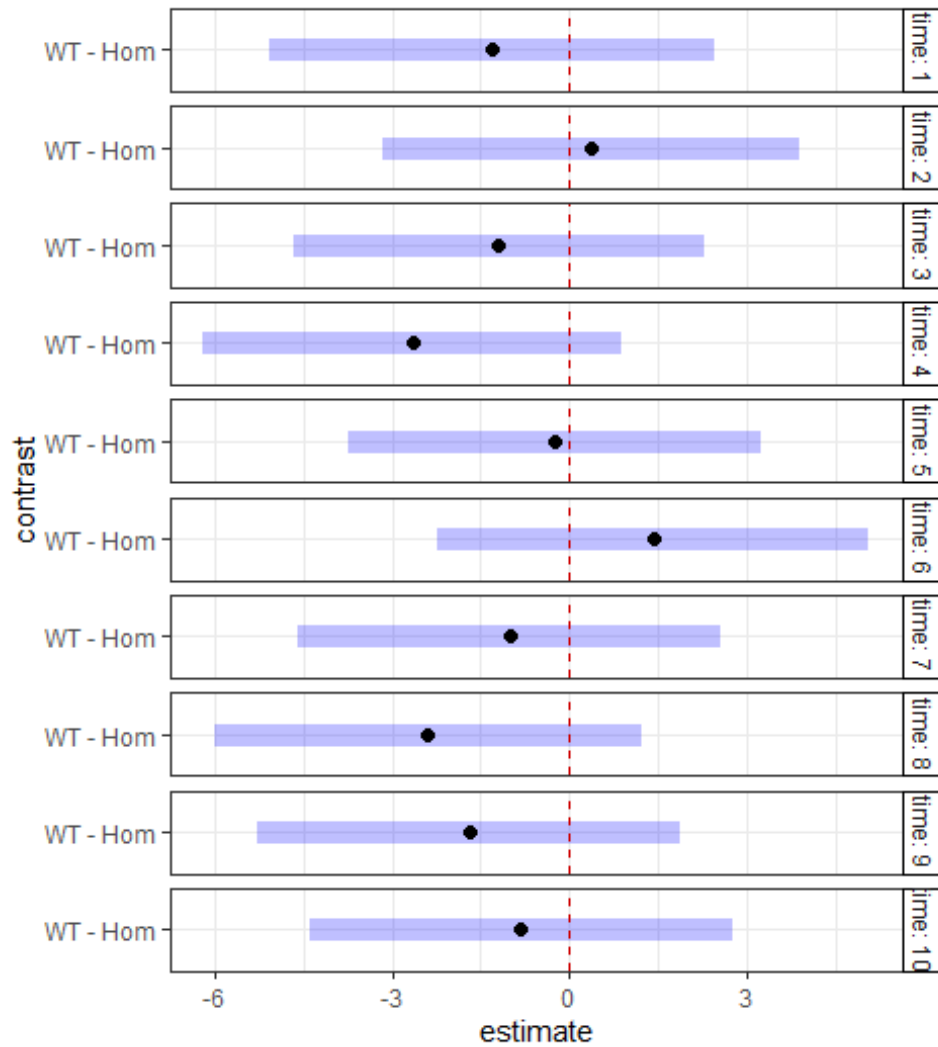

```
##
##
## Table: Post hoc Tukey's: Mean differences between groups at each trial
##
## contrast      time      estimate      SE      df      t.ratio
## p.value
## -----
## WT - Hom      1      -1.3004345    1.918724    882.8071    -0.6777601
## 0.4981014
## WT - Hom      2       0.3646247    1.796033    761.8937     0.2030167
## 0.8391762
## WT - Hom      3     -1.1879440    1.776618    741.2595    -0.6686546
## 0.5039240
## WT - Hom      4     -2.6452924    1.802227    769.4645    -1.4677907
## 0.1425697
```



|                          |    |            |          |          |            |
|--------------------------|----|------------|----------|----------|------------|
| ## WT - Hom<br>0.8918407 | 5  | -0.2423898 | 1.781993 | 748.1265 | -0.1360217 |
| ## WT - Hom<br>0.4440474 | 6  | 1.4195334  | 1.853791 | 821.1744 | 0.7657462  |
| ## WT - Hom<br>0.5797395 | 7  | -1.0073247 | 1.818289 | 784.6014 | -0.5539959 |
| ## WT - Hom<br>0.1931563 | 8  | -2.3927226 | 1.837183 | 805.8301 | -1.3023868 |
| ## WT - Hom<br>0.3521795 | 9  | -1.6926888 | 1.818289 | 784.2603 | -0.9309237 |
| ## WT - Hom<br>0.6537833 | 10 | -0.8185861 | 1.824428 | 799.9087 | -0.4486810 |

## Checking model validity

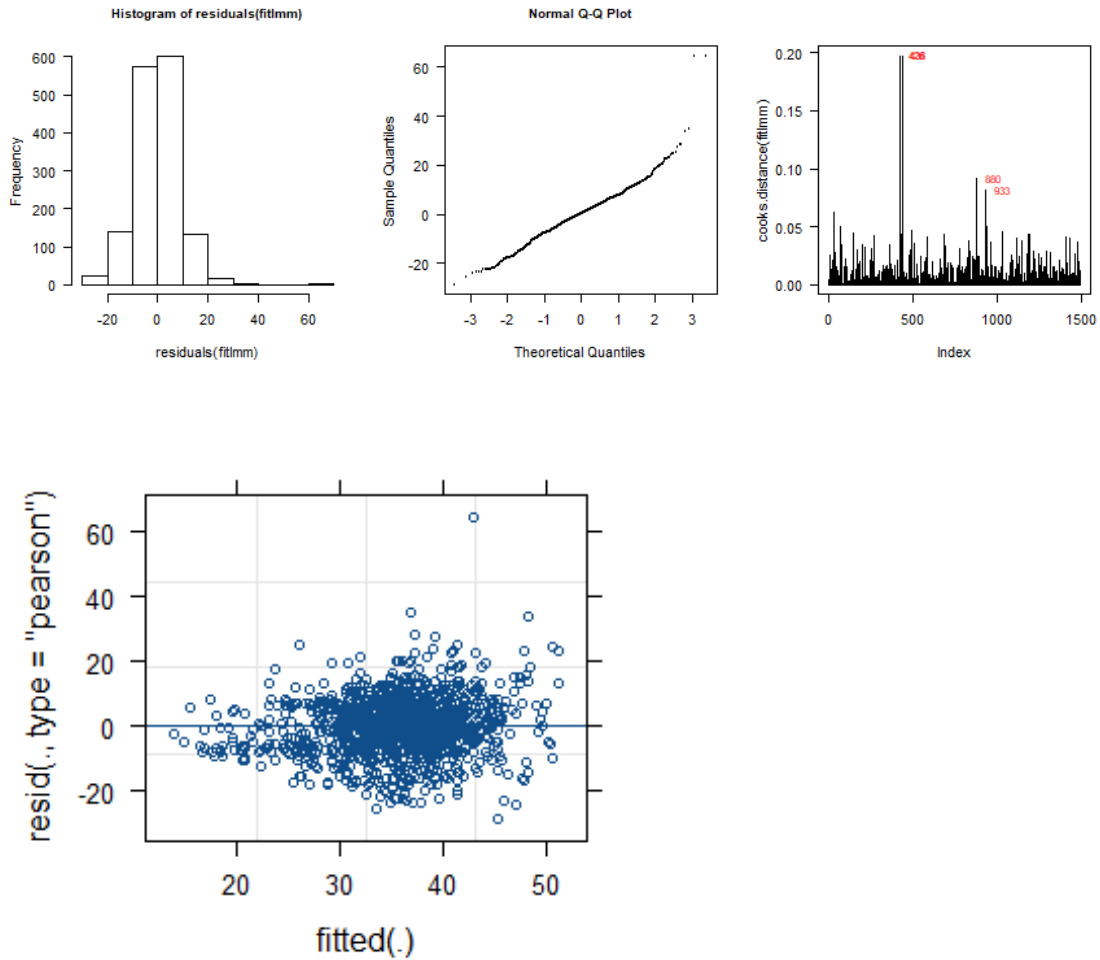

## Conclusion

No significant difference was detected between the two groups (Type II Wald chi-square test;  $n^s p = 0.370$ ). Adj. Pvalue:  $n^s p = 1$  (for  $M_{eff} = 7.456$  tests). Significant effect of trial (Type II Wald chi-square test;  $*** p = 1.8e-8$ ). Adj. Pvalue:  $*** p = 1.4e-7$  (for  $M_{eff} = 7.456$  tests).

## R session information

```
## R version 3.6.1 (2019-07-05)
## Platform: x86_64-w64-mingw32/x64 (64-bit)
## Running under: Windows 10 x64 (build 17134)
##
## Matrix products: default
##
## locale:
## [1] LC_COLLATE=French_France.1252 LC_CTYPE=French_France.1252
## [3] LC_MONETARY=French_France.1252 LC_NUMERIC=C
## [5] LC_TIME=French_France.1252
##
## attached base packages:
## [1] stats      graphics  grDevices  utils      datasets  methods   base
##
## other attached packages:
## [1] corrplot_0.84      emmeans_1.4.5      readxl_1.3.1
##      reshape2_1.4.3
## [5] lme4_1.1-21       Matrix_1.2-18      car_3.0-7         carData_3.0-3
## [9] plyr_1.8.6        data.table_1.12.8  knitr_1.28
##      RColorBrewer_1.1-2
## [13] ggplot2_3.3.0
##
## loaded via a namespace (and not attached):
## [1] Rcpp_1.0.4          mvtnorm_1.1-0      lattice_0.20-41    assertthat_0.2.1
## [5] digest_0.6.25      R6_2.4.1           cellranger_1.1.0  evaluate_0.14
## [9] highr_0.8          pillar_1.4.3       rlang_0.4.5       curl_4.3
## [13] minqa_1.2.4        nloptr_1.2.2.1     rmarkdown_2.1     labeling_0.3
## [17] splines_3.6.1      stringr_1.4.0      foreign_0.8-76    munsell_0.5.0
## [21] compiler_3.6.1     xfun_0.12          pkgconfig_2.0.3   htmltools_0.4.0
## [25] tidyselect_1.0.0   tibble_3.0.0       rio_0.5.16        fansi_0.4.1
## [29] crayon_1.3.4       dplyr_0.8.5        withr_2.1.2       MASS_7.3-51.5
## [33] grid_3.6.1         nlme_3.1-145       xtable_1.8-4      gtable_0.3.0
## [37] lifecycle_0.2.0    magrittr_1.5       scales_1.1.0      zip_2.0.4
## [41] estimability_1.3   cli_2.0.2          stringi_1.4.6     farver_2.0.3
## [45] ellipsis_0.3.0     vctrs_0.2.4        boot_1.3-24       openxlsx_4.1.4
## [49] tools_3.6.1        forcats_0.5.0      glue_1.3.2        purrr_0.3.3
## [53] hms_0.5.3          parallel_3.6.1     pbkrtest_0.4-8.6  abind_1.4-5
## [57] yaml_2.2.1         colorspace_1.4-1   haven_2.2.0
```
